1  
2  
3  
4  
5  
6  
7  
8  
9  
10  
11  
12  
13  
14  
15  
16  
17  
18  
19  
20  
21  
22  
23

Ongoing mitigation strategies and further needs of the United States food industry to control  
COVID-19 in the work environment

Sebastian Llanos-Soto<sup>1\*</sup>, Ece Bulut<sup>1</sup>, Sarah I. Murphy<sup>1</sup>, Christopher J. Henry<sup>1</sup>, Claire Zoellner<sup>2</sup>,  
Martin Wiedmann<sup>3</sup>, Diane Wetherington<sup>2</sup>, Aaron Adalja<sup>4</sup>, Samuel D. Alcaine<sup>3</sup>, Renata Ivanek<sup>1</sup>

<sup>1</sup> Department of Population Medicine and Diagnostic Sciences, College of Veterinary Medicine,  
Cornell University, Ithaca, New York, United States of America

<sup>2</sup> iFoodDecisionSciences, Inc., Bellevue, Washington, United States of America

<sup>3</sup> Department of Food Science, College of Agriculture and Life Sciences, Cornell University,  
Ithaca, New York, United States of America

<sup>4</sup> School of Hotel Administration, Cornell University, Ithaca, New York, United States of  
America

\* Corresponding author

E-mail: [sgl67@cornell.edu](mailto:sgl67@cornell.edu)

## 24 **Abstract**

25 The COVID-19 pandemic has had dire effects on the United States (US) food industry through  
26 impacts on workers' health and wellbeing and supply chain disruptions. The objectives of this  
27 study were to determine what the food industry needs to be able to control COVID-19 impacts in  
28 the work environment and what mitigation strategies are being implemented. A web-based needs  
29 assessment survey was distributed from January to April 2021, via 13 food professional/trade  
30 organizations and 2 social networks, targeting management professionals at food (produce, dairy,  
31 poultry, and beef/pork) processing facilities and produce farm operations in the US. Statistical  
32 analyses evaluated patterns in self-reported adoption of mitigation strategies against COVID-19  
33 in the participants' facilities/operations and perceived needs of the industry regarding COVID-  
34 19. Responses to open-ended questions were analyzed using thematic analysis. In total 145  
35 responses were received, of which 79 were usable, including 38 (48%) from the dairy, 17 (22%)  
36 from the fresh produce, and 24 (30%) from a mixture of other food industry sectors. Only two  
37 usable responses were from the beef/pork sector and none from the poultry sector. Findings  
38 revealed that several social distancing, biosecurity, and surveillance mitigation strategies against  
39 COVID-19 are commonly implemented in the participants' facilities/operations, but their  
40 implementation frequency differs by the facility/operation size and industry sector. Also,  
41 findings indicated that collaboration between the food industry and government agencies,  
42 contingency plans and appropriate training, and new technologies are needed to control COVID-  
43 19 in the food industry. Subject to limitations associated with the relatively low response rate  
44 (possible selection bias), the findings suggest that the US food industry is prepared to safeguard  
45 workers' health and businesses in the event of a new COVID-19 variant or similar future

46 disaster, provided that appropriate structures are put in place to ensure coordination and  
47 compliance, both before and during such an outbreak.

48 Keywords: COVID-19, dairy, fresh produce, mitigation strategies, food industry management

## 49 **Introduction**

50 The COVID-19 pandemic, caused by the SARS-CoV-2 beta-coronavirus virus, has  
51 presented important challenges to the food industry in the United States (US) and around the  
52 world. The food industry has dealt with disruptions in the supply chain [1–5], difficulties  
53 meeting market demands and changes in food consumption patterns [2,6,7], negative effects on  
54 production capacity [8], labor shortages [9], and decreases in productivity due to absenteeism  
55 [10–12], while adopting various public health measures to safeguard its workforce’s health [13].  
56 The US food industry, including transportation and logistics, is more than ever considered  
57 critical infrastructure for the nation because of its key role in feeding the US population [14].  
58 The maintenance of such activities has led to the occurrence of COVID-19 outbreaks across all  
59 industry sectors in the US, including poultry [15], beef/pork [15], dairy [16], and fresh produce  
60 [17]. Indeed, from April 2020 to July 2021, more than 90,000 cases and 450 deaths related to  
61 COVID-19 have been reported across food industry sectors in the US [18]. Some of these  
62 outbreaks have involved widespread transmission of COVID-19 among employees, as was the  
63 case for a central New York State greenhouse in which more than half (171/300) of the workers  
64 tested positive for the virus [17]. Food and agriculture workers are amongst the occupations most  
65 severely affected by excess deaths due to COVID-19 according to a study comparing the total  
66 number of deaths in two scenarios, one theoretical scenario in which COVID-19 never happened  
67 (established based on pre-pandemic data for 2018 and 2019) and one scenario that projected

68 deaths during the COVID-19 pandemic [19]. To improve the ability of the US food industry to  
69 more effectively and quickly respond to COVID-19 related disturbances and similar future  
70 disasters, it is essential to understand the needs and concerns of the food industry regarding the  
71 ongoing pandemic. This requires understanding the specific needs and concerns of the various  
72 industry sectors, as impacts (e.g., COVID-19 related deaths), challenges, and responses to these  
73 challenges might be different across food industry sectors. For instance, industry sectors  
74 providing employees with housing and transportation might require additional preventive  
75 measures to avoid contact between COVID-19 infected and healthy employees [20].

76 In the US, governmental institutions, such as the Centers for Disease Control and  
77 Prevention (CDC) and the Occupational Safety and Health Administration (OSHA) have  
78 published guidelines and checklists to inform and guide the US food industry and other  
79 businesses about the correct implementation of social distancing, biosafety, and surveillance  
80 strategies to assist in preventing COVID-19 cases [20–23]. The guidelines usually recommend  
81 the adoption of multiple methods to socially distance workers, sanitize and clean the workplace  
82 and workers' hands, enforce mask-wearing, and apply surveillance tests to identify COVID-19  
83 cases and prevent further spread. These guidelines were established early in the COVID-19  
84 pandemic (around June 2020) [20,23] and prior to the widespread availability of vaccines to  
85 reduce transmission in the workplace (late 2020 – early 2021) [21,22]. The proper  
86 implementation of these strategies is considered important in reducing the occurrence of  
87 COVID-19 cases in the workplace and/or limiting the size of an outbreak; for example, air  
88 ventilation and social distancing have been shown to be effective in reducing COVID-19  
89 dissemination among employees in German meat industry facilities in 2020 [24]. Nonetheless,  
90 there is a gap in information regarding what the food industry perceives as needed to properly

91 address COVID-19 transmission in food production facilities and operations. Currently,  
92 information about the adoption of mitigation strategies in the US food industry remains scarce  
93 and limited to certain sectors, such as the meat [15], poultry [15], and dairy sectors [25].  
94 Although, these studies have provided valuable information, they were performed in a  
95 comparatively earlier period in the COVID-19 pandemic (April – July, 2020) when the adoption  
96 of mitigation strategies by the US food industry could have been different (e.g., vaccine  
97 availability) and information, such as guidelines to implement ventilation in buildings [22] and  
98 OSHA’s instructions to prevent COVID-19 transmission in the workplace [21], have not yet  
99 been published. In addition, the study by Yung et al. [25] was restricted to dairy farmers in the  
100 states of Minnesota and Wisconsin, which represents a small part of the US dairy industry and  
101 might not reflect the adoption of mitigation strategies in other dairy facilities and operations in  
102 the country.

103 This information is important as knowing how commonly social distancing, biosafety,  
104 and surveillance mitigation strategies were adopted to prevent COVID-19 cases across the US  
105 food industry and the reasons behind such adoption or lack of adoption are crucial to identify  
106 areas where prevention could be improved. Therefore, the objectives of this study were to  
107 identify the needs of the US food industry (targeting produce farm operations as well as produce,  
108 dairy, poultry, beef/pork processing facilities) in mitigating the impact of the COVID-19  
109 pandemic on workforce and food production, and to assess the ongoing implementation of  
110 COVID-19 mitigation strategies in the work environment. These objectives were addressed  
111 through the administration of a needs assessment survey between January and April, 2021,  
112 detailed in the “Materials and methods” section.

## 113 **Materials and methods**

## 114 **Needs assessment survey design and data collection**

115 A two-part web-based needs assessment survey was developed. Part 1 asked general  
116 questions about a survey participant's overall industry sector (produce, dairy, poultry, beef/pork,  
117 or other), and part 2 asked about conditions and COVID-19 mitigation strategies in a food  
118 production facility or operation of the participant's choice (participants who oversee multiple  
119 facilities and/or operations were asked to choose one). The wording of questions can be found in  
120 S1 Appendix, S1 Table (additionally, the S1 Appendix includes a complete copy of the survey  
121 instrument including introduction letter and the consent statement). Briefly, the questions  
122 included in part 1 were about a participant's industry sector, their main role in their organization,  
123 how COVID-19 has impacted their industry sector, concerns about COVID-19 control,  
124 challenges in maintaining production capacity, needs to successfully mitigate COVID-19,  
125 desired features of a computational modeling tool that aids decision making in control of  
126 COVID-19, and indicators of a successful response against COVID-19. Part 2 included questions  
127 about the industry sector of the participant's selected facility/operation, maximum tolerable  
128 reduction in the production labor force that is compatible with maintaining full production  
129 capacity, number and age of employees, availability of employer-provided housing and  
130 transportation for employees, importance of different specialized job functions for maintaining  
131 production in the event of a COVID-19 outbreak, sources of COVID-19 in the facility/operation,  
132 and adoption of COVID-19 mitigation strategies (definitions of mitigation strategies provided to  
133 survey participants are shown in Table 1). Part 2 also included several questions applicable only  
134 to participants from the produce food sector. Survey questions were initially designed by E.B.,  
135 R.I., and S.L.-S. The design process included discussing preliminary versions of the survey with  
136 A.A., C.Z., D.W., S.D.A., S.I.M., and M.W. until a consensus was reached regarding the

137 phrasing and content of the questions included in the final version of the survey. The survey was  
138 piloted between December 8, 2020, and January 6, 2021, by obtaining anonymous responses  
139 from 7 out of 10 members of an advisory council for the authors' COVID-19 research grant  
140 comprised of executive-level managers representing the produce, dairy, beef/pork, and poultry  
141 industry sectors. Feedback from the piloting process was incorporated into the final version of  
142 the survey.

143

144 **Table 1. Definitions of social distancing, biosafety, and surveillance mitigation strategies**  
145 **provided to study participants in the needs assessment survey.**

| <b>Mitigation strategy</b>                           | <b>Definition</b>                                                                                                                                                                                                                                                                                                                                                                                                                                                                                                   |
|------------------------------------------------------|---------------------------------------------------------------------------------------------------------------------------------------------------------------------------------------------------------------------------------------------------------------------------------------------------------------------------------------------------------------------------------------------------------------------------------------------------------------------------------------------------------------------|
| <b>Social distancing</b>                             |                                                                                                                                                                                                                                                                                                                                                                                                                                                                                                                     |
| Installed physical barriers                          | Clear plastic partitions preventing employees from getting too close and preventing particles or droplets exhaled by one person from entering the breathing zone of another.                                                                                                                                                                                                                                                                                                                                        |
| Staggered break times                                | Groups of employees have different break times.                                                                                                                                                                                                                                                                                                                                                                                                                                                                     |
| Staggered arrival/departure times (staggered shifts) | Groups of employees have a set number of hours to work during the day, but they have different start and finish times.                                                                                                                                                                                                                                                                                                                                                                                              |
| Downsizing operation                                 | Reduction of a facility's production capacity accompanied by a reduction in the number of employees.                                                                                                                                                                                                                                                                                                                                                                                                                |
| Adjusted sick day policy                             | Employee benefits include a paid sick leave granted when an employee is unable to work because the employee is quarantined or isolated due to COVID-19, because of a bona fide need to care for an individual subject to quarantine or isolation, or to care for a child (under 18 years of age) whose school or childcare provider is closed or unavailable for reasons related to COVID-19. (Definition is adapted from US Dept. of Labor "Families First Coronavirus Response Act: Employee Paid Leave Rights"). |
| Spacing workers >6ft during production               | Keeping a space at least 6 feet between employees.                                                                                                                                                                                                                                                                                                                                                                                                                                                                  |
| Cohorting employees                                  | Establishing groups of employees based on their risk of infection in the company, where each cohort remains as separated from the other cohorts as possible.                                                                                                                                                                                                                                                                                                                                                        |
| <b>Biosafety</b>                                     |                                                                                                                                                                                                                                                                                                                                                                                                                                                                                                                     |
| Enhanced handwashing                                 | Implementation of a set of instructions for employees about                                                                                                                                                                                                                                                                                                                                                                                                                                                         |

|                                         |                                                                                                                                                                                                                                                                                                                                                                                                                                                      |
|-----------------------------------------|------------------------------------------------------------------------------------------------------------------------------------------------------------------------------------------------------------------------------------------------------------------------------------------------------------------------------------------------------------------------------------------------------------------------------------------------------|
|                                         | when and how to wash hands that goes above and beyond instructions that were in place pre-COVID-19.                                                                                                                                                                                                                                                                                                                                                  |
| Alcohol-based hand rubs                 | Implementation of a set of instructions for employees about when and how to use.                                                                                                                                                                                                                                                                                                                                                                     |
| Face mask, face shields, and/or goggles | Implementation of a set of instructions about how and when to use face masks, face shields and goggles. Face masks are often referred to as surgical masks or procedure masks. They cover the nose and mouth and are secured under the chin, fit snugly against the side of the face, and do not have gaps. Face shields are secondary protectors intended to protect the entire face against exposure. Goggles shield the eyes against the hazards. |
| Increased air ventilation rates         | Increase in the rate at which external air (fresh air) flows into the building.                                                                                                                                                                                                                                                                                                                                                                      |
| Air cleaning/filtering                  | Destroying or removing hazards like viral particles from the air.                                                                                                                                                                                                                                                                                                                                                                                    |
| <b>Surveillance</b>                     |                                                                                                                                                                                                                                                                                                                                                                                                                                                      |
| Temperature screening and quarantine    | Screen for employees with a temperature above 99.5°F (or other cut-off value) and keep identified employees away from the workplace to determine whether they develop COVID-19 symptoms or test positive for the disease.                                                                                                                                                                                                                            |
| Test for infection and isolation        | Test employees for COVID-19 infection (viral test); Isolation: keep away from the workplace an employee who is sick with COVID-19 or tested positive for COVID-19 without symptoms.                                                                                                                                                                                                                                                                  |
| Contact tracing and quarantine          | Contact tracing is a process to identify individuals who may have been exposed to a person with COVID-19. Quarantine is the practice of separating individuals who have had close contact with someone with COVID-19 to determine whether they develop symptoms or test positive for the disease.                                                                                                                                                    |
| Return to work post recovery policy     | Any strategy implemented for employees returning to work following a COVID-19 infection based on symptoms or doctor's recommendation.                                                                                                                                                                                                                                                                                                                |

146

147           The survey was implemented in the Qualtrics survey platform (Qualtrics, Provo, UT) and

148 made available online to survey participants through a link. After clicking on the link

149 participants were shown an introductory letter that provided information about the purpose of the

150 survey and asked to consent to take part in the study. Individuals older than 18 years and

151 affiliated with a produce farm operation or with produce, dairy, beef/pork, poultry, or other food

152 processing facility in the US were considered eligible to participate in the survey; recruitment



153 targeted management professionals at those facilities and operations. No identifying information  
 154 was collected from participants and their responses remained confidential. No compensation for  
 155 participation was provided (S1 Appendix). The survey took approximately 30 minutes to  
 156 complete.

157 A number of food industry professional/trade organizations were contacted to request  
 158 their assistance in disseminating the survey to their management professional members. This  
 159 resulted in successfully collected responses via 13 organizations, including 3 associated with the  
 160 fresh produce industry, 5 with dairy, 1 with beef/pork & poultry, and 4 with general processing.  
 161 Additionally, the survey was distributed via two social networks of study authors (Table 2). The  
 162 period for survey distribution started on January 19, 2021, and concluded on April 6, 2021. The  
 163 study was approved by the Cornell University Institutional Review Board for Human  
 164 Participants (IRB protocol #2006009660). No power-based sample calculation was conducted  
 165 due to the preliminary nature of the investigation.

166

167 **Table 2. Number of needs assessment survey responses (total received and usable) by the**  
 168 **industry sector and social media recruitment targets.**

| <b>Recruitment target</b>                                                             | <b>Total responses</b> | <b>Usable responses</b> |
|---------------------------------------------------------------------------------------|------------------------|-------------------------|
| - Recruitment venue                                                                   |                        |                         |
| Fresh Produce                                                                         | 31                     | 17                      |
| - United Fresh Produce Association                                                    |                        |                         |
| - Produce Marketing Association                                                       |                        |                         |
| - IAFP Professional Development Group (PDG)<br>Fruit and Vegetable Safety and Quality |                        |                         |
| Dairy                                                                                 | 61                     | 35                      |
| - Northeast Dairy Foods Association                                                   |                        |                         |
| - International Dairy Foods Association                                               |                        |                         |
| - New York State Cheese Manufacturers'<br>Association                                 |                        |                         |

- IAFP PDG Dairy Quality and Safety
- Dairy Management Inc

|                                                |     |    |
|------------------------------------------------|-----|----|
| Beef/pork and Poultry                          | 3   | 0  |
| – IAFP PDG Meat and Poultry Safety and Quality |     |    |
| General processing                             | 29  | 17 |
| – Minnesota AgriGrowth Council                 |     |    |
| – American Frozen Food Institute (AFFI)        |     |    |
| – Midwest Food Products Association            |     |    |
| – Food Northwest                               |     |    |
| Social media                                   | 21  | 10 |
| – LinkedIn                                     |     |    |
| – Twitter                                      |     |    |
| Total                                          | 145 | 79 |

169 A response was considered usable when participant completed at least part 1 of the survey.  
170

## 171 **Data management and statistical analysis**

172 Only responses from participants that completed at least part 1 of the survey were  
173 considered usable (Table 2). These were organized in an Excel datasheet (Microsoft, Seattle,  
174 WA) for subsequent analysis. Responses to multiple choice and open-ended questions asking for  
175 specific numbers were treated as numerical data for statistical analysis. If a participant responded  
176 an interval to a question asking for a specific number, then the mean of the interval was used.  
177 Incomplete responses or those unrelated to the corresponding questions were included as missing  
178 values in the datasheet. Statistical analysis was carried out in R v. 4.0.3 [26]. Responses to the  
179 survey questions were summarized and organized in tables and visualized using heatmaps.  
180 Responses to numeric open-ended questions were summarized using median, mean, interquartile  
181 range (IQR), and range. Levels in Likert items were treated as interval (with assigned values  
182 values 1-5) or numerical (with assigned values 0, 0.5 or 1) data for statistical analysis, so that the  
183 median score of responses to a Likert item could be calculated. Responses to the question Q20

184 “What was the average number of employees in this facility/operation in 2019?” were  
185 transformed from interval to nominal data by grouping responses in the levels “Small” (1-49  
186 employees), “Medium” (50-249 employees), and “Large” (>250 employees) based on criteria  
187 established by the Organisation for Economic Co-operation and Development (OECD) [31]; this  
188 variable served as a proxy for facility/operation size.

189 A complete plan of analysis of survey questions can be found in S1 Appendix, S1 Table,  
190 including questions identified as the outcomes of interest and independent variables (predictors)  
191 in the analysis of associations. As applicable, Kruskal-Wallis, Fisher’s exact, Mann-Whitney U  
192 or Spearman’s rank correlation tests were used to identify predictors associated with the  
193 outcomes of interest at the bivariable level. Associations were considered significant at  $p \leq 0.05$ .  
194 Post-hoc assessment of significant associations was carried out using the Dunn’s test to  
195 determine specific statistical differences between variable levels. Obtained  $p$ -values were  
196 adjusted for multiple testing using the false discovery rate (FDR) [27]. The data underlying the  
197 results presented in the study are available in Zenodo (doi: 10.5281/zenodo.5165334).

## 198 **Thematic analysis**

199 Thematic analysis involves determining common themes or ideas that are repeated across  
200 participants’ open-ended responses to a certain question [28]. As a follow-up to certain Likert  
201 questions or multiple-choice questions, we asked an open-ended question to gain a deeper  
202 understanding of participants’ opinions/perceptions. These open-ended questions were  
203 preliminarily assessed to select questions with diverse and informative responses for thematic  
204 analysis. In other words, questions with responses that provided new information (i.e., not being  
205 accounted for in responses to other questions in the survey) and diverse enough to generate at

206 least two codes were selected. During the initial assessment, a preliminary codebook was  
207 generated to classify participants' responses into codes and subsequently identify themes  
208 emerging from those codes. This codebook was further refined through discussions among  
209 authors (S.L.-S., S.I.M., E.B., and R.I.). Theme identification across questions was first carried  
210 out individually by authors (S.L.-S., S.I.M., E.B., and R.I.), and a final consensus was reached  
211 following discussion. Details for codes and themes can be found in S2 Table.

## 212 **Results**

### 213 **Responses from 79 survey participants could be analyzed, most** 214 **being from the dairy industry sector and acting as corporate food** 215 **safety and quality managers**

216 In total, 145 survey responses were collected. However, based on the decision to only  
217 include responses from participants that completed at least part 1 of the survey (usable  
218 responses), responses from only 79 participants were retained for statistical (Tables 3-5) and  
219 thematic analysis (Table 6). The following results were obtained from responses to questions in  
220 part 1, where participants answered general questions about the industry sector to which they  
221 belong (Table 3). Among 79 participants, 38 (48%) were from the dairy industry sector, 17  
222 (22%) from fresh produce, and 22 (28%) from other food industry sectors (e.g., chocolate  
223 production, frozen food, prepared food, wine production, cereals) (Q1, Table 3). Only two  
224 responses were obtained from the beef/pork industry and thus were grouped into the "Other"  
225 category for statistical analysis. Three participants self-reported association with all 4 food  
226 industry sectors (i.e., Fresh produce, Dairy, Poultry, and Beef/pork) and thus were grouped in the

227 “Other” category. No responses were received from the poultry sector. (Note: as stated, Q1 in  
 228 part 1 asked for the industry sector of a participant, which is different from Q15 in part 2 that  
 229 asked about the industry sector of a facility/operation the participant chose to describe; this is  
 230 why responses to Q1 and Q15 are slightly different although they both ask about the industry  
 231 sector.)

232

233 **Table 3. Number and proportion of responses among survey participants (N=79) for**  
 234 **questions, analyzed as categorical variables, from each of the two parts of the needs**  
 235 **assessment survey (part 1: General questions about a participant’s industry sector; part 2:**  
 236 **Conditions and COVID-19 controls in a facility or operation of participant’s choice).**

| Q <sup>a</sup>  | Variable                                                                                                   | Response                                                                  | Number | %  |
|-----------------|------------------------------------------------------------------------------------------------------------|---------------------------------------------------------------------------|--------|----|
| <b>Part 1</b>   |                                                                                                            |                                                                           |        |    |
| Q1 <sup>b</sup> | What industry sector are you in?<br>(select all that apply)                                                | Fresh produce                                                             | 17     | 22 |
|                 |                                                                                                            | Dairy                                                                     | 38     | 48 |
|                 |                                                                                                            | Poultry                                                                   | 0      | 0  |
|                 |                                                                                                            | Beef/pork <sup>c</sup>                                                    | 2      | 3  |
|                 |                                                                                                            | Other <sup>d</sup>                                                        | 22     | 28 |
| Q2 <sup>b</sup> | Select your main role within your<br>organization                                                          | C-suite                                                                   | 13     | 16 |
|                 |                                                                                                            | Regional manager                                                          | 0      | 0  |
|                 |                                                                                                            | Facility manager                                                          | 21     | 26 |
|                 |                                                                                                            | Research and development                                                  | 3      | 4  |
|                 |                                                                                                            | Corporate food safety and quality                                         | 29     | 37 |
|                 |                                                                                                            | Other <sup>e</sup>                                                        | 11     | 14 |
|                 |                                                                                                            | Prefer not to answer                                                      | 2      | 3  |
| Q3              | Did COVID-19 have a significant<br>impact on your industry sector?                                         | Yes                                                                       | 67     | 85 |
|                 |                                                                                                            | No                                                                        | 12     | 15 |
| Q4              | In which way(s) has COVID-19<br>significantly impacted your<br>industry sector? (select all that<br>apply) | Operations/production has been<br>reduced/cut back                        | 38     | 57 |
|                 |                                                                                                            | Operations/production has expanded                                        | 23     | 34 |
|                 |                                                                                                            | Implemented robotics, sensors,<br>automation, and/or computer<br>modeling | 5      | 7  |
|                 |                                                                                                            | Management/corporate employees<br>working remotely                        | 52     | 78 |

|                                                                                                    |                                                                                                                                                                                                              |                                                                        |    |    |
|----------------------------------------------------------------------------------------------------|--------------------------------------------------------------------------------------------------------------------------------------------------------------------------------------------------------------|------------------------------------------------------------------------|----|----|
|                                                                                                    |                                                                                                                                                                                                              | Major changes in operational staffing control and protection protocols | 54 | 81 |
|                                                                                                    |                                                                                                                                                                                                              | Other                                                                  | 1  | 1  |
| <b>Part 2: Conditions and COVID-19 controls in a facility or operation of participant's choice</b> |                                                                                                                                                                                                              |                                                                        |    |    |
| Q15 <sup>b</sup>                                                                                   | In what industry sector is this facility/operation?                                                                                                                                                          | Fresh produce                                                          | 17 | 22 |
|                                                                                                    |                                                                                                                                                                                                              | Dairy                                                                  | 40 | 51 |
|                                                                                                    |                                                                                                                                                                                                              | Poultry                                                                | 0  | 0  |
|                                                                                                    |                                                                                                                                                                                                              | Beef/pork                                                              | 1  | 1  |
|                                                                                                    |                                                                                                                                                                                                              | Other <sup>f</sup>                                                     | 20 | 25 |
|                                                                                                    |                                                                                                                                                                                                              | No response                                                            | 1  | 1  |
| Q20 <sup>g</sup>                                                                                   | What was the average number of employees in this facility/operation in 2019?                                                                                                                                 | Small (1-49 workers)                                                   | 25 | 32 |
|                                                                                                    |                                                                                                                                                                                                              | Medium (50-249 workers)                                                | 33 | 42 |
|                                                                                                    |                                                                                                                                                                                                              | Large (>250 workers)                                                   | 16 | 20 |
|                                                                                                    |                                                                                                                                                                                                              | Prefer not to answer                                                   | 1  | 1  |
|                                                                                                    |                                                                                                                                                                                                              | Missing                                                                | 4  | 5  |
| Q22                                                                                                | Does this facility/operation provide group temporary (seasonal) housing to any of your employees?                                                                                                            | Yes                                                                    | 9  | 11 |
|                                                                                                    |                                                                                                                                                                                                              | No                                                                     | 67 | 85 |
|                                                                                                    |                                                                                                                                                                                                              | No response                                                            | 3  | 4  |
| Q24                                                                                                | Does this facility/operation provide group transportation services (bus, truck, etc.) to employees to/from work?                                                                                             | Yes                                                                    | 8  | 10 |
|                                                                                                    |                                                                                                                                                                                                              | No                                                                     | 68 | 86 |
|                                                                                                    |                                                                                                                                                                                                              | No response                                                            | 3  | 4  |
| Q31                                                                                                | If in the future the available labor force in this facility/operation is affected by a COVID-19 outbreak, what short/mid-term solutions should be considered to maintain production? (check all that apply)  | Extend the number of work hours for remaining workers                  | 59 | 75 |
|                                                                                                    |                                                                                                                                                                                                              | Backfill with emergency personnel from third-party companies           | 28 | 35 |
|                                                                                                    |                                                                                                                                                                                                              | Backfill by reorganizing personnel in the same facility                | 48 | 61 |
|                                                                                                    |                                                                                                                                                                                                              | No response                                                            | 7  | 9  |
| Q32                                                                                                | To prevent labor shortage in this facility/operation due to a potential future COVID-19 outbreak, should capital investment into mechanization be considered as a long-term solution to maintain production? | Yes                                                                    | 57 | 72 |
|                                                                                                    |                                                                                                                                                                                                              | No                                                                     | 13 | 16 |
|                                                                                                    |                                                                                                                                                                                                              | No response                                                            | 9  | 11 |
| Q43 <sup>b</sup>                                                                                   | What was the main reason for your choice to describe conditions and COVID-19 mitigation in this particular food production facility/operation?                                                               | I am mostly familiar with this facility/operation                      | 24 | 30 |
|                                                                                                    |                                                                                                                                                                                                              | This is our unique facility/operation                                  | 5  | 6  |
|                                                                                                    |                                                                                                                                                                                                              | This is our typical facility/operation                                 | 16 | 20 |
|                                                                                                    |                                                                                                                                                                                                              | This facility/operation has been impacted greatly by COVID-19          | 11 | 14 |
|                                                                                                    |                                                                                                                                                                                                              | This is our strategically important                                    | 13 | 16 |

|                                                                       |                                                                                                               | facility/operation      |    |     |
|-----------------------------------------------------------------------|---------------------------------------------------------------------------------------------------------------|-------------------------|----|-----|
|                                                                       |                                                                                                               | Other                   | 4  | 5   |
|                                                                       |                                                                                                               | No response             | 0  | 0   |
| <hr/>                                                                 |                                                                                                               |                         |    |     |
| <i>Questions applicable only to the fresh produce industry sector</i> |                                                                                                               |                         |    |     |
| <hr/>                                                                 |                                                                                                               |                         |    |     |
| Q16 <sup>h</sup>                                                      | How does this facility/operation operate?                                                                     | Year-round              | 15 | 88  |
|                                                                       |                                                                                                               | Seasonally              | 2  | 12  |
|                                                                       |                                                                                                               | No response             | 0  | 0   |
| <hr/>                                                                 |                                                                                                               |                         |    |     |
| Q18 <sup>h</sup>                                                      | What role best describes this facility/operation?                                                             | Grower                  | 2  | 12  |
|                                                                       |                                                                                                               | Packing House           | 2  | 12  |
|                                                                       |                                                                                                               | Processor               | 4  | 24  |
|                                                                       |                                                                                                               | Grower and Field packer | 5  | 29  |
|                                                                       |                                                                                                               | Grower and Processor    | 3  | 18  |
|                                                                       |                                                                                                               | Other                   | 1  | 6   |
|                                                                       |                                                                                                               | No response             | 0  | 0   |
| <hr/>                                                                 |                                                                                                               |                         |    |     |
| Q19 <sup>i</sup>                                                      | Please select which part of your Grower and Processor operation will you describe in the remaining questions? | Grower operation        | 0  | 0   |
|                                                                       |                                                                                                               | Processor facility      | 3  | 100 |
|                                                                       |                                                                                                               | No response             | 0  | 0   |

237 <sup>a</sup> Question (Q) number in the needs assessment survey.

238 <sup>b</sup> Participants were required to answer the question to continue the needs assessment survey.

239 <sup>c</sup> Two participants from the beef/pork industry were grouped in the “Other” category for statistical analysis.

240 <sup>d</sup> Participants’ provided responses for the “Other” industry sector (number responses): Food processing (2); Frozen  
 241 fruits (2); Chocolate (1); Cereal (1); Co-packaging of shelf-stable products (1); Consumer packaged goods with  
 242 fresh produce (1); Food manufacturing (1); Food service (1); Frozen produce (1); Manufacturing shelf-stable foods  
 243 (1); Prepared food (1); Restaurants (1); Seafood (1); Spirits (1); Sugar (1); Vegetable processing (1). Additional 4  
 244 participants were grouped into the “Other” category for statistical analysis: 1 participant who is an academic  
 245 affiliated with the food industry and 3 participants who reported affiliation with all 4 sectors (i.e., Fresh produce,  
 246 Dairy, Poultry, and Beef/pork).

247 <sup>e</sup> Participants’ provided responses for the “Other” main role within their organization (number responses): Quality  
 248 assurance manager (3); Sales service (1); Affineur (1); Human resources director (1); Owner (1); Office manager  
 249 (1); CEO (1); Emeritus professor (1); Grower (1).

250 <sup>f</sup> Participants’ provided responses grouped under the “Other” industry sector for the described facility/operation of  
 251 the participant’s choice (number responses): Cleaning and sanitation (1); Restaurants (1); Chocolate (1); Prepared  
 252 food (1); Food manufacturing (1); Shelf-stable products (2); Frozen Produce (1); CPG sauces (2); Cereal (1); Food  
 253 processing (2); Beverage, spirits (1); Vegetable processing (1); Frozen fruits (2); Seafood (1); Sugar (1).  
 254 Additionally, one participant who answered “Other” specified working in all industry sectors.

255 <sup>g</sup> Original levels “Less than 10”, “10-49”, “50-99”, “100-249”, “250-499”, “500-999”, “1000-2000”, and “More than  
 256 2000” were grouped in the levels “Small” (1-49 employees), “Medium” (50-249 employees), and “Large” (>250  
 257 employees) based on criteria established by the Organisation for Economic Co-operation and Development (OECD).

258 <sup>h</sup> This question was only shown to 17 participants who selected the option “Fresh produce” in question Q15.

259 <sup>i</sup> This question was only shown to 3 participants who selected the option “Grower and Processor” in question Q18.

260

261

262 **Table 4. Summary statistics for questions included in part 2 of the needs assessment survey**

263 **(that asked about conditions and COVID-19 controls in a food production facility or**

264 operation of participant’s choice), which were analyzed as interval variables (number of  
 265 survey participants =79).

| Q <sup>a</sup> | Variable                                                                                                                                                                                         | Number of responses | Mean | Median | IQR   | Range             | No response     |
|----------------|--------------------------------------------------------------------------------------------------------------------------------------------------------------------------------------------------|---------------------|------|--------|-------|-------------------|-----------------|
| Q26            | What is the largest percent reduction in the general production labor force that this facility/operation could withstand over a period of one week without reduction in the production capacity? | 66                  | 15   | 15     | 10-15 | 5-50 <sup>b</sup> | 13 <sup>c</sup> |
| Q21            | What is the approximate proportion (%) of employees in this facility/operation that are between 50-69 years of age? <sup>d</sup>                                                                 | 66                  | 32   | 28     | 20-40 | 0-100             | 13              |
| Q21            | What is the approximate proportion (%) of employees in this facility/operation that are 70 years old or older? <sup>d</sup>                                                                      | 62                  | 3    | 1      | 0-5   | 0-17              | 17              |
| Q23            | Approximately what proportion (%) of employees in this facility/operation are provided with group temporary housing? <sup>e</sup>                                                                | 7                   | 49   | 35     | 35-70 | 10-100            | 2               |
| Q25            | Approximately what proportion (%) of employees in this facility/operation are provided with group transportation to/from work? <sup>f</sup>                                                      | 7                   | 40   | 28     | 15-63 | 10-90             | 1               |

266 <sup>a</sup> Question (Q) number in the needs assessment survey  
 267 <sup>b</sup> This was a single-choice question with available responses: 5%, 10% , 15%, 20%, 30%, 40%, 50%, and Do not  
 268 know; thus, the observed range spanned the full range of possible responses.  
 269 <sup>c</sup> Nine participants responded “Do not know” and were grouped with “No response” for analysis.  
 270 <sup>d</sup> The original question asked about ‘50-69 years of age’ and ‘70 years or older’ but were separated here to more  
 271 clearly indicate their values.  
 272 <sup>e</sup> This question was only shown to 9 participants who selected “Yes” in question Q22: “Does this facility/operation  
 273 provide group temporary (seasonal) housing to any of your employees?”.  
 274 <sup>f</sup> This question was only shown to 8 participants who selected “Yes” in question Q24: “Does this facility/operation  
 275 provide group transportation services (bus, truck, etc.) to employees to/from work?”.  
 276

277 **Table 5. Significant associations found in the bivariable analyses ( $p \leq 0.05$ ) between a**  
 278 **specific Likert item (outcome) in a survey question (Q) and independent variables**



279 (predictors) describing “Industry sector” (Q1) and “Facility/operation size” (Q20) after  
 280 post-hoc analysis and false discovery rate adjustment.

| Likert question (Q) <sup>@</sup><br>- Item                                                                                                          | Predictor               | Level <sup>#</sup>         | Median <sup>*</sup> | IQR <sup>*</sup> |
|-----------------------------------------------------------------------------------------------------------------------------------------------------|-------------------------|----------------------------|---------------------|------------------|
| Q5, Regarding control of COVID-19 in your industry sector, how concerning are the items below?                                                      |                         |                            |                     |                  |
| - Limited financial resources                                                                                                                       | Facility/operation size | Small <sup>a</sup>         | 3.5                 | 2-5              |
|                                                                                                                                                     |                         | Medium <sup>b</sup>        | 2                   | 2-3              |
|                                                                                                                                                     |                         | Large <sup>b</sup>         | 2                   | 1-3.3            |
| - Limited financial resources                                                                                                                       | Industry sector         | Dairy <sup>a</sup>         | 2                   | 1-3              |
|                                                                                                                                                     |                         | Fresh produce <sup>b</sup> | 3                   | 2-4              |
|                                                                                                                                                     |                         | Other <sup>a,c</sup>       | 3                   | 2-4              |
| - Supplier management                                                                                                                               | Facility/operation size | Small <sup>a</sup>         | 3                   | 3-5              |
|                                                                                                                                                     |                         | Medium <sup>a,b</sup>      | 3                   | 2-4              |
|                                                                                                                                                     |                         | Large <sup>c,b</sup>       | 2                   | 2-3.3            |
| Q9, Regarding needs to successfully mitigate COVID-19 in your industry sector, how important are the items below?                                   |                         |                            |                     |                  |
| - Easier way to understand regulations                                                                                                              | Industry sector         | Dairy <sup>a</sup>         | 4                   | 3-4              |
|                                                                                                                                                     |                         | Fresh produce <sup>b</sup> | 5                   | 3-5              |
|                                                                                                                                                     |                         | Other <sup>a,c</sup>       | 3                   | 2-4              |
| Q13, Regarding indicators of successful responses to COVID-19 in your industry sector, how important are the items below?                           |                         |                            |                     |                  |
| - Established effective risk communication plan                                                                                                     | Facility/operation size | Small <sup>a</sup>         | 3.5                 | 3-4              |
|                                                                                                                                                     |                         | Medium <sup>a,b</sup>      | 4.0                 | 4-5              |
|                                                                                                                                                     |                         | Large <sup>c,b</sup>       | 5.0                 | 4-5              |
| Q29, Regarding potential sources of COVID-19 infection in this facility/operation, how concerning are the items below?                              |                         |                            |                     |                  |
| - Indoor common areas                                                                                                                               | Facility/operation size | Small <sup>a</sup>         | 2.5                 | 1-4              |
|                                                                                                                                                     |                         | Medium <sup>b</sup>        | 4                   | 3-4              |
|                                                                                                                                                     |                         | Large <sup>a,c</sup>       | 3                   | 2-4              |
| Q34, Have any of these social distancing strategies been applied in this facility/operation, at any point since the start of the COVID-19 pandemic? |                         |                            |                     |                  |

|                                                        |                         |                              |     |       |
|--------------------------------------------------------|-------------------------|------------------------------|-----|-------|
| - Installed physical barriers                          | Facility/operation size | Small <sup>a</sup>           | 0   | 0-0.6 |
|                                                        |                         | Medium <sup>b</sup>          | 1   | 0.5-1 |
|                                                        |                         | Large <sup>b</sup>           | 1   | 0.5-1 |
| - Staggered break times                                | Facility/operation size | Small <sup>a</sup>           | 0   | 0-1   |
|                                                        |                         | Medium <sup>b</sup>          | 1   | 1-1   |
|                                                        |                         | Large <sup>b</sup>           | 1   | 0.5-1 |
| - Staggered arrival/departure times (staggered shifts) | Facility/operation size | Small <sup>a</sup>           | 0   | 0-0.5 |
|                                                        |                         | Medium <sup>b</sup>          | 1   | 0-1   |
|                                                        |                         | Large <sup>b</sup>           | 0.5 | 0-1   |
| - Adjusted sick day policy                             | Facility/operation size | Small <sup>a</sup>           | 0   | 0-1   |
|                                                        |                         | Medium <sup>b</sup>          | 1   | 0.5-1 |
|                                                        |                         | Large <sup>a,b</sup>         | 0.8 | 0.5-1 |
| - Spacing workers >6ft during production               | Facility/operation size | Small <sup>a</sup>           | 0.5 | 0-0.5 |
|                                                        |                         | Medium <sup>b</sup>          | 1   | 0.8-1 |
|                                                        |                         | Large <sup>b</sup>           | 1   | 0.5-1 |
| - Spacing workers >6ft during production               | Industry sector         | Dairy <sup>a</sup>           | 1   | 1-1   |
|                                                        |                         | Fresh produce <sup>a,b</sup> | 0.5 | 0.5-1 |
|                                                        |                         | Other <sup>c,b</sup>         | 1   | 0.5-1 |
| - Cohorting employees                                  | Facility/operation size | Small <sup>a</sup>           | 0   | 0-0   |
|                                                        |                         | Medium <sup>b</sup>          | 0.5 | 0-1   |
|                                                        |                         | Large <sup>a,b</sup>         | 0.5 | 0-0.6 |

Q36, Have any of these employee biosafety strategies been applied in this facility/operation, at any point since the start of the COVID-19 pandemic?

|                                    |                         |                            |     |       |
|------------------------------------|-------------------------|----------------------------|-----|-------|
| - Face mask, face shields, goggles | Industry sector         | Dairy <sup>a</sup>         | 1   | 1-1   |
|                                    |                         | Fresh produce <sup>b</sup> | 1   | 0.5-1 |
|                                    |                         | Other <sup>a,c</sup>       | 1   | 1-1   |
| - Air cleaning/filtering           | Facility/operation size | Small <sup>a</sup>         | 0   | 0-0.1 |
|                                    |                         | Medium <sup>b</sup>        | 1   | 0-1   |
|                                    |                         | Large <sup>a,b</sup>       | 0.5 | 0-1   |

Q38, Have any of these surveillance strategies been applied in this facility/operation, at any point since the start of the COVID-19 pandemic?

|                                        |                         |                      |     |       |
|----------------------------------------|-------------------------|----------------------|-----|-------|
| - Temperature screening and quarantine | Facility/operation size | Small <sup>a</sup>   | 0.3 | 0-1   |
|                                        |                         | Medium <sup>b</sup>  | 1   | 1-1   |
|                                        |                         | Large <sup>a,b</sup> | 1   | 0.5-1 |
| - Contact tracing and quarantine       | Facility/operation size | Small <sup>a</sup>   | 0   | 0-0.8 |
|                                        |                         | Medium <sup>b</sup>  | 1   | 1-1   |
|                                        |                         | Large <sup>b</sup>   | 1   | 0.9-1 |
| - Contact tracing and quarantine       | Industry sector         | Dairy <sup>a</sup>   | 1   | 1-1   |

|   |                                     |                            |                      |       |       |
|---|-------------------------------------|----------------------------|----------------------|-------|-------|
|   |                                     | Fresh produce <sup>b</sup> | 0.5                  | 0.5-1 |       |
|   |                                     | Other <sup>a,b</sup>       | 1                    | 0-1   |       |
| - | Return to work post recovery policy | Facility/operation size    | Small <sup>a</sup>   | 1     | 0.4-1 |
|   |                                     |                            | Medium <sup>b</sup>  | 1     | 1-1   |
|   |                                     |                            | Large <sup>a,b</sup> | 1     | 0.9-1 |

281 Other statistically significant associations found in this study are presented in S3 Table.

282 <sup>@</sup> Likert question (Q) number in the needs assessment survey.

283 <sup>#</sup> Different letters in superscripts indicate statistically significantly different levels. When two levels of a predictor  
 284 have different superscript letters, it means that the Likert responses for an outcome variable were significantly  
 285 different between the two levels of a predictor, while having the same letter means no evidence of significant  
 286 difference. For example, in Q5, the responses to the underlying Likert item outcome “Limited financial resources”  
 287 were significantly different between “Small” and “Medium”, as well as between “Small” and “Large” levels of the  
 288 predictor “Facility/operation size” (indicated by different superscripts, a and b) but there was no evidence of  
 289 difference between “Medium” and “Large” facilities/operations (indicated by the same superscript, b).

290 <sup>\*</sup> Median and interquartile range (IQR) calculated for the interval (1-5 in Q5, Q9, Q13, and Q29) and numeric values  
 291 (0, 0.5 or 1 in Q34, Q36, and Q38) that were assigned to the Likert scale responses in each Likert item are included  
 292 for comparison across facility/operation size and industry sector levels. For Q5 and Q29, values 1 to 5 represented  
 293 “Not at all concerning” to “Extremely concerning”; while for Q9 and Q13, values 1 to 5 represented “Not at all  
 294 important” to “Extremely important”. For Q34, Q36, and Q38, the value 0 represented “No” (not implemented), 0.5  
 295 represented “Yes, but only partially/temporarily, and 1 represented “Yes”.

296

297 **Table 6. Themes identified in participants’ responses to selected open-ended questions in**  
 298 **the needs assessment survey, the purpose of which was to provide depth to the**  
 299 **corresponding Likert items questions.**

| Likert question <sup>a</sup> | Corresponding open-ended question (Number (N) of responses)                                                                                                                              | Themes                                                                                                                                                                                                                                                                |
|------------------------------|------------------------------------------------------------------------------------------------------------------------------------------------------------------------------------------|-----------------------------------------------------------------------------------------------------------------------------------------------------------------------------------------------------------------------------------------------------------------------|
| Q5                           | Q6, Regarding control of COVID-19 in your industry sector, are there any other concerns we should consider? (N=19)                                                                       | Employee fatigue, vaccine hesitancy, health and healthcare access<br>Access to COVID-19 preventative measures, guidance and information; difficulties in implementation of mitigation strategies<br>Supply chain disruption and management of contractor expectations |
| Q7                           | Q8, Regarding the labor force needed to maintain the production capacity in your industry sector during the COVID-19 pandemic, are there any other challenges we should consider? (N=20) | Downside of COVID-19 mitigation strategies<br>Government benefits and regulations<br>Labor availability, needs, expectations and behavior                                                                                                                             |
| Q9                           | Q10, Regarding needs to successfully mitigate COVID-19 in your industry sector, are there                                                                                                | Technology to improve infection prevention, time efficiency and internet access<br>Cost-effective mitigation strategies, harmonized                                                                                                                                   |

|     |                                                                                                                                                                                                                                                                                                              |                                                                                                            |
|-----|--------------------------------------------------------------------------------------------------------------------------------------------------------------------------------------------------------------------------------------------------------------------------------------------------------------|------------------------------------------------------------------------------------------------------------|
|     | any other important needs we should consider? (N=8)                                                                                                                                                                                                                                                          | guidance and prioritized vaccination of food industry workers<br>Consumer education                        |
| Q32 | Q33, To maintain production in the event of labor shortage in this facility/operation due to a potential future COVID-19 outbreak, are there any other solutions we should consider? (N=9)                                                                                                                   | Employee benefits and training<br>Industry collaboration, production adjustment and infrastructure changes |
| Q34 | Q35, For one or more of these social distancing strategies, could you share any reasons for adopting or not adopting it, such as cost, compliance by workers, training requirement, effectiveness in reducing health risks, impact on production capacity, and/or lack of science-based information? (N=12)  | Infrastructure, productivity or Union imposed constrains<br>Lack of concern or need                        |
| Q36 | Q37, For one or more of these employee biosafety strategies, could you share any reasons for adopting or not adopting it, such as cost, compliance by workers, training requirement, effectiveness in reducing health risks, impact on production capacity, and/or lack of science-based information? (N=10) | Infrastructure constrains<br>Lack of funds, supplies or information<br>Lack of need                        |
| Q38 | Q39, For one or more of these surveillance strategies, could you share any reasons for adopting or not adopting it, such as cost, compliance by workers, training requirement, effectiveness in reducing health risks, impact on production capacity, and/or lack of science-based information? (N=10)       | Cost of implementation<br>Increases worker absences<br>Lack of concern or need                             |

300 <sup>a</sup>The complete wording of the Likert questions can be found in S1 Table.

301

302 The most common roles of the 79 participants in their organizations were corporate food

303 safety and quality manager (29, 37%), followed by facility managers (21, 27%), and c-suite

304 executive (13, 16%) among others (Q2, Table 3). Most (67/79, 85%) indicated that COVID-19  
305 has significantly impacted their industry sector. The most common ways COVID-19 has  
306 significantly impacted their industry sector was through major changes in operational staffing  
307 control and protection protocols (54/79, 68%), remote work of management or corporate  
308 employees (52/79, 66%), and reduced or cut back operations/production (38/79, 48%) (Q4, Table  
309 3).

310 **Participants' chosen facilities/operations could withstand up to a**  
311 **median of 15% reduction of the production labor force over a week**  
312 **while still being able to maintain the full production capacity**

313 The following results include responses from part 2 of the needs assessment, which asked  
314 about a facility or operation of participant's choice (Tables 3 and 4). The most common reason  
315 for selecting a facility to describe in the survey was participant's familiarity with the facility  
316 (24/79, 30%) (Q43, Table 3). In terms of the average number of employees in 2019, most  
317 participants (33/79, 42%) chose to describe a medium size-facility/operation (50-249 employees)  
318 (Q20, Table 3). The largest percent reduction in the general production labor force over a week  
319 that the participants' facility/operation could withstand without reducing their production  
320 capacity had a median of 15% (IQR: 10%-15%; Q26, Table 4). Only 11% and 10% of the  
321 participants' facilities/operations provided group temporary (seasonal) housing and  
322 transportation to employees, respectively (Q22 and Q24, Table 4). Regarding short/mid-term  
323 solutions to maintain production and prevent their facility/operation labor force from being  
324 affected in the event of a COVID-19 outbreak, most of the participants' facilities and operations  
325 considered extending the number of work hours for remaining workers (59/79, 75%) and/or

326 backfilling by reorganizing personnel in the same facility (48/79, 61%) (Q31, Table 3). Most  
327 participants (57/79, 72%) agreed that capital investment into mechanization should be considered  
328 as a long-term solution to maintain production in the face of a future COVID-19-associated labor  
329 shortage (Q32, Table 3). Further, participants suggested employee- and production schedule  
330 adjustments as additional solutions to maintain production (thematic analysis of Q33, Table 6).

331 **Ever-changing government regulations and easier ways to**  
332 **understand these regulations as well as establishing risk**  
333 **communication plans were deemed important to participants for**  
334 **successful mitigation of COVID-19 in their industry sector**

335       Regarding the control of COVID-19 in their industry sector (Q5, Fig 1A), *Labor*  
336 *availability* and *Complex ever-changing government regulations* were considered very  
337 concerning (median score = 4) among the majority of participants. Conversely, *Workers' abuse*  
338 *of control measures*, *Limited financial resources*, and *Product quality* were only slightly  
339 concerning (median score  $\leq 2$ ), according to most survey participants (Fig 1A). Kruskal Wallis  
340 tests showed that the reported concern for *Limited financial resources* was significantly higher in  
341 small compared to medium ( $p = 0.04$ ) and large-sized facilities/operations ( $p = 0.04$ ) and was  
342 also significantly higher in the fresh produce industry sector compared to dairy (Q5,  $p = 0.05$ ;  
343 Table 5). Similarly, the reported concern for *Supplier management* was also significantly higher  
344 in small compared to large-sized facilities/operations (Q5,  $p = 0.03$ ; Table 5). In response to the  
345 open-ended question about additional concerns regarding the control of COVID-19 in their  
346 industry sector, participants stated concerns related to employees, COVID-19 mitigation, and

347 supply chain factors (thematic analysis of Q6, Table 6). Regarding employee’s mental health, a  
348 participant stated the following:

349 “Mental health impact on managerial and office staff. In talking with industry colleagues,  
350 my experience is that many facilities have cut back on the staff responsible for ensuring  
351 that the facility is operating in an efficient and structured manner, while expanding the  
352 production capacity of the facility. It leaves many of these employees in a position where  
353 they are stretched thin and feel overwhelmed.” Participant ID #75, Other (co-packaging  
354 of shelf stable products)

355

356 <Figure 1 here>

357 **Fig 1. Heatmaps representing responses to 5-point scale Likert questions regarding [A]**  
358 **concerns about COVID-19 control and [B] challenges to maintain production.** These Likert  
359 questions were included in part 1 of the needs assessment survey asking general questions about  
360 a participant’s industry sector. For each item within a Likert question, a median shown to the  
361 right of the heatmap was calculated from the interval values (1-5), assigned to answers ranging  
362 from “Not at all concerning” to “Extremely concerning” [A] and “Not at all challenging” to  
363 “Extremely challenging” [B].

364

365 Among challenges associated with the labor force needed to maintain the production  
366 capacity (Q7, Fig 1B), most participants perceived that all of the items presented to them were at  
367 least moderately challenging (median score  $\geq 3$ ), with the *Need to train labor*, *Access to workers*  
368 *with necessary skills*, and *Access to number of workers needed* being considered very

369 challenging (median score = 4). Additional challenges to maintaining the production capacity  
370 were related to the COVID-19 mitigation, employee and government factors (thematic analysis  
371 of Q8, Table 6). In particular, one participant expressed their frustration when dealing with  
372 continuously changing government regulations:

373 “Government directives and laws regarding labor, time off, and pay rules and the changes  
374 in these made managing government special rules a full-time job, rather than managing  
375 the pandemic we were managing the labor law compliance tasks.” Participant ID #45,  
376 Fresh produce.

377 In terms of the needs to successfully mitigate COVID-19 in their industry sector (Q9, Fig  
378 2A), most participants indicated that *Easier way to understand regulations* was the most  
379 important (median score = 3.5), being valued as a more important need by the fresh produce  
380 industry compared to the dairy industry sector and the group of “Other” industry sectors ( $p =$   
381  $0.05$  and  $p = 0.03$ , respectively; Table 5). In the corresponding open-ended question participants  
382 further stated needs for improved technology solutions, mitigation strategies and consumer  
383 education (thematic analysis of Q10, Table 6).

384

385 < Figure 2 here >

386 **Fig 2. Heatmaps representing responses to 5-point scale Likert questions regarding the [A]**  
387 **needs to successfully mitigate COVID-19, [B] preferred features in predictive models, and**  
388 **[C] indicators of a successful response against COVID-19.** These questions were included in  
389 part 1 of the needs assessment survey asking general questions about a participant’s industry  
390 sector. For each item within a Likert question, a median shown to the right of the heatmap was



391 calculated from the interval values (1-5), assigned to answers ranging from “Not at all  
392 important” to “Extremely important”.

393

394 If a computational modeling tool were to be available to predict which COVID-19  
395 mitigation strategies would be the most successful in a given facility (Q11, Fig 2B), all model  
396 features proposed in the survey (e.g., ease of use, confidentiality and customization, etc.) would  
397 be considered very important (median score = 4). Regarding the question about indicators of  
398 successful responses to COVID-19 in their industry sector (Q13, Fig 2C), participants perceived  
399 that almost all items listed in the question were very important (median score = 4), including  
400 establishment of contingency and risk communication plans, standard operating procedures,  
401 training, and investment into technologies that reduce vulnerability to a future pandemic (such as  
402 due to a new COVID-19 variant) or similar system wide disruption. Additionally, large-sized  
403 facilities and operations were more likely to have *Established effective risk communication plans*  
404 compared to smaller facilities and operations (Q13,  $p = 0.03$ , Table 5).

405 In terms of the risk of shutdown associated with the facility/operation due to work  
406 absences for certain specialized job functions (Q27, Fig 3A), participants indicated that  
407 *Specialized production line functions, Engineering and/or maintenance crew, and Sanitation and*  
408 *cleaning* presented a high risk of shutdown (median score = 4). Regarding potential sources of  
409 COVID-19 infection in the facility/operation (Q29, Fig 3B), participants were particularly  
410 concerned about *Activities in the local community* (median score = 4). In addition, respondents  
411 from medium-sized facilities/operations were more likely to be concerned about *Indoor common*  
412 *areas* as a potential source of COVID-19 compared to small and large-sized facilities/operations  
413 (Q29,  $p = 0.04$  and  $p = 0.05$ , respectively; Table 5).

414

415

< Figure 3 here >

416 **Fig 3. Heatmaps representing responses to 5-point scale Likert questions regarding [A] the**

417 **risk of shut down due to absenteeism of employees with specialized job functions and [B]**

418 **sources of COVID-19 in the work environment.** These Likert questions were included in part

419 1 of the needs assessment survey that asked about conditions and COVID-19 controls in a

420 facility or operation of a participant's choice. For each item within a Likert question, a median

421 shown to the right of the heatmap was calculated from the interval values (1-5), assigned to

422 answers ranging from "No risk" to "Very high risk" [A] and "Not at all concerning" to

423 "Extremely concerning"[B].

424

425 **Survey participants self-reported a widespread implementation of**

426 **social distancing, biosafety, and surveillance mitigation strategies in**

427 **their facilities/operations representing different sectors of the food**

428 **industry**

429 Among social distancing measures (Q34, Fig 4A), *Installed Physical barriers*, *Staggered*

430 *break times*, *Adjusted sick day policy*, and *Spacing workers >6 ft during production* were all

431 implemented or partially/temporarily implemented by most facilities/operations, followed by

432 *Staggered shifts* which were adopted or partially/temporarily adopted by about half of the

433 participants' facilities/operations. *Downsizing operations* and *Cohorting employees* were found

434 to be the least implemented social distancing strategies to mitigate COVID-19 transmission (Fig

435 4A). Small facilities/operations implemented several social distancing strategies significantly  
436 less frequently than medium- and large-sized facilities and operations, including installing of  
437 physical barriers ( $p = 0.005$  and  $p = 0.005$ , respectively), staggered break times ( $p < 0.001$  and  $p$   
438  $= 0.004$ , respectively), and staggered shifts ( $p = 0.02$  and  $p = 0.04$ , respectively; Q34, Table 5). In  
439 addition, medium-sized facilities and operations were more likely to adopt *Adjusted sick day*  
440 *policy* ( $p = 0.003$ ) and *Cohorting employees* ( $p = 0.02$ ) as one of their social distancing strategies  
441 compared to small-sized facilities and operations (Q34, Table 5). In addition, dairy facilities  
442 were more likely to adopt *Spacing workers >6ft during production* ( $p = 0.05$ ) compared to  
443 facilities/operations from the group of “Other” industry sectors (Q34, Table 5). The responses to  
444 the corresponding open-ended question revealed that infrastructure, productivity, and union-  
445 imposed constraints as well as the perceived lack of need or concern were reasons for non-  
446 implementation of social distancing measures (thematic analysis of Q35, Table 6). For example,  
447 in the following quote one of the participants expressed a concern about downsizing the  
448 operation as a strategy to contain the infection spread:

449 “If the plant does not run near full production, we are out of business.” Participant ID  
450 #56, Dairy.

451

452 < Figure 4 here >

453 **Fig 4. Responses to questions about the implementation of social distancing [A], biosafety**  
454 **[B], and surveillance strategies [C] in a facility/operation of participant’s choice.** For each  
455 specific mitigation strategy, a median shown to the right of the heatmap was calculated from the

456 numerical values, 0, 0.5 and 1, assigned to answers ‘No’, ‘Yes, but only partially’, and ‘Yes’,  
457 respectively.

458

459 *Enhanced handwashing, Alcohol-based hand rubs, and Face mask, face shields, goggles,*  
460 *were the most implemented biosafety strategies among facilities/operations (Q36, Fig 4B). The*  
461 *latter strategy was implemented more in facilities/operations in the dairy and “Other” industry*  
462 *sector group compared with the fresh produce sector (Q36,  $p = 0.002$  and  $p = 0.05$ , respectively;*  
463 *Table 5). Air cleaning/filtering was implemented or partially/temporarily implemented in a little*  
464 *more than half of the facilities/operations, with medium-sized facilities and operations being*  
465 *more likely to adopt it compared to small facilities and operations (Q36,  $p = 0.01$ ; Table 5).*  
466 *Meanwhile, less than half of the facilities and operations adopted Increased ventilation rates as a*  
467 *biosafety measure to mitigate COVID-19 transmission (Q36, Fig 4B). The responses to the*  
468 *corresponding open-ended question indicated that where biosafety interventions were not*  
469 *implemented, it was due to infrastructure constrains or lack of funds, lack of supplies or*  
470 *information, or due to the perceived lack of need (thematic analysis of Q37, Table 6).*

471 *Among surveillance strategies (Q38, Fig 4C), Temperature screening and quarantine,*  
472 *Return to work post recovery policy, and Contact tracing were commonly adopted among*  
473 *facilities and operations, while Test for infection and isolation was less frequently implemented*  
474 *than the rest of the surveillance strategies based on the comparison of medians of Likert*  
475 *responses. Contact tracing and quarantine ( $p < 0.001$ ), Temperature screening and quarantine*  
476 *( $p = 0.006$ ), and Return to work post recovery policy ( $p = 0.002$ ) were more commonly adopted*  
477 *in medium-sized compared to small facilities/operations (Q38, Table 5). Contact tracing and*  
478 *quarantine were also more commonly implemented in large-sized compared to small*

479 facilities/operations ( $p < 0.001$ ). Additionally, dairy facilities more commonly adopted *Contact*  
480 *tracing and quarantine* as a surveillance measure compared to the fresh produce sector (Q38,  $p =$   
481  $0.02$ ; Table 5). The responses to the corresponding open-ended question stated the cost of  
482 implementation and the caused increase in worker absences, as well as the perceived lack of  
483 concern or need, as the reasons for no implementation of surveillance strategies (thematic  
484 analysis of Q39, Table 6). For example, two participants expressed challenges due to increased  
485 absences when implementing temperature screening as a surveillance strategy:

486 “Temperature screenings aren't sufficient, as they aren't always going to detect a mild  
487 case. Temperature gun is 30 to 60 dollars. On site Covid tests are borderline unavailable  
488 to small and medium sized companies.” Participant ID #56, Dairy.

489 “We do daily employee temperature readings but have had to isolate many employees for  
490 symptoms other than low grade fevers such as backaches, coughing, fatigue, etc.”  
491 Participant ID #46, Fresh produce.

## 492 **Discussion**

493 This study aimed to identify the needs of the US food industry to maintain production  
494 and assure workers' health during the COVID-19 pandemic and to determine what mitigation  
495 strategies are being implemented. Information on this matter is crucial to determine both how the  
496 US food industry has already responded to the pandemic and what is still required to enhance its  
497 resilience in the face of current and future similar disaster events. The main findings from this  
498 study suggest that for the represented sectors of the US food industry: (i) mitigation strategies  
499 have been widely implemented in facilities and operations of those who answered our survey,  
500 except strategies that reduce productivity, involve major costs, or/and had insufficient

501 information on cost-effectiveness; (ii) facility/operation size and industry sector may impact  
502 decision-making regarding implementation of COVID-19 mitigation strategies; and (iii) there are  
503 remaining challenges and opportunities to reduce future impacts of COVID-19 and similar  
504 disasters. These findings will be discussed in the following paragraphs.

505 Before discussing these findings, it is important to consider that survey responses were  
506 collected from January 2021 to April 2021, a period in which COVID-19 cases in the US food  
507 industry were still occurring but there was a declining trend [18]. Additionally, during this time  
508 vaccines were becoming available in the US and access was prioritized for essential non-  
509 healthcare workers [29], including food industry employees, and the percentage of fully  
510 vaccinated people among those eligible ranged from 0 to 21% during that period [30]. Thus,  
511 results presented in this study reflect the state of the US food industry sectors in terms of needs  
512 and regarding the impact of COVID-19 pandemic on the workforce, food production, and  
513 regarding implementation of COVID-19 mitigation in early 2021.

514 **The US produce growers and food processors widely implemented**  
515 **mitigation strategies except those that would have had negative**  
516 **effects on the production capacity, those that required major**  
517 **investments, and/or those with insufficient information on cost-**  
518 **effectiveness.**

519 The study participants self-reported adopting most social distancing mitigation strategies  
520 included in the survey, while those measures that negatively impacted production capacity were  
521 scarcely adopted. The widespread adoption of most social distancing strategies across assessed

522 food industry sectors is not surprising given such strategies' well-established key role in  
523 reducing the occurrence of COVID-19 cases in different work settings [31] and countries [32].  
524 The continuous promotion of such measures since the beginning of the COVID-19 pandemic, as  
525 well as the availability of updated guidance on how to implement them, likely facilitated their  
526 adoption by food facilities and operations [22,33]. For example, a COVID-19 outbreak that  
527 occurred in a Colorado mushroom farm on May 6, 2020, was rapidly controlled and further viral  
528 dissemination was prevented based on available public health guidance [34]. Additionally, we  
529 hypothesize that the common adoption of social distancing mitigation strategies may be partly  
530 due to the availability of funding programs launched by the US federal government to financially  
531 assist businesses during the pandemic. These programs include the Coronavirus Aid, Relief, and  
532 Economic Security Act (CARES Act), the COVID-19 Economic Injury Disaster Loan, and the  
533 Coronavirus Food Assistance Program (CFAP), which provided food facilities and operations  
534 with financial resources to implement social distancing [35–38]. Despite this, survey participants  
535 expressed concerns about financial challenges that limited their ability to install physical  
536 barriers, suggesting that additional sources of funding are necessary to further incentivize the  
537 adoption of such measures and that companies need to budget in advance for emergency  
538 preparedness and responses. Overall, findings from this study suggest that the common adoption  
539 of social distancing strategies and the current availability of detailed guidance for their  
540 implementation will contribute to rapid implementation of social distancing controls in response  
541 to new SARS-CoV-2 beta-coronavirus variants in the current pandemic, future COVID-19  
542 pandemics, and similar disasters. Additionally, our findings address the gap in terms of currently  
543 limited information available [15] about the adoption of mitigation strategies in the US food  
544 industry. However, it is important to note that representation for the beef/pork and poultry

545 industries was barely achieved in our study, thus future studies on COVID-19 adoption of social  
546 distancing mitigation strategies in the US poultry and meat industry sectors are required to  
547 complement and update the information reported by Waltenburg [15].

548         At the same time, our survey revealed that social distancing measures based on cohorting  
549 employees and in particular, downsizing operations, were rarely implemented. Intuitively, this  
550 may be because businesses avoid strategies that would reduce production capacity or present  
551 organizational disruption [39]. Despite findings in this study, downsizing was an option for some  
552 businesses during the COVID-19 pandemic to prevent further dissemination of the virus in cases  
553 of facility/operation' outbreaks, even in late 2020 [11]. For instance, capacity reduction in the  
554 Canadian beef/pork industry led to financial setbacks to the business and in turn increased the  
555 cost to maintain animals for an extended period before slaughter [11]. It has been reported that  
556 downsizing operations as well as the increase in sickness-related absences caused an increase in  
557 work-related physical demands and job insecurity, which had negative impacts on employees'  
558 mental health [40]. This is relevant to consider, given that one survey participant in this study  
559 expressed food industry employees' struggles with mental health issues after downsizing,  
560 particularly due to facilities and operations cutting back management and office staff while  
561 distributing the same weight of responsibilities to a smaller workforce. Thus, if  
562 facilities/operations plan on adopting, or are forced to adopt, downsizing as a strategy to reduce  
563 COVID-19 transmission, measures should be taken not only to prevent downstream food supply  
564 disturbances and production losses to the facility but also to protect employees' mental  
565 wellbeing. Further studies are needed to determine the specific economic and other effects of  
566 downsizing on the US food industry facilities/operations and their workers prior to and during  
567 the COVID-19 pandemic.



568 Cheap and easy to implement biosafety mitigation strategies were widely adopted by the  
569 survey participants' produce farm operations and food processing facilities, but more information  
570 is needed about cost-effectiveness for air cleaning and air filtering/ventilation. The self-reported  
571 use of personal protective equipment (PPE) observed in our study agrees with an earlier report  
572 from Waltenburg [15], in which 86 out of 111 (77%) of the meat and poultry processing facilities  
573 required workers to wear masks. However, this is in contrast with findings by Yung et al. [25],  
574 who indicated that between June and July 2020, only a little more than half (20/37, 54%) of  
575 consulted dairy farmers in Wisconsin and Minnesota believed that face masks are being used by  
576 workers after the COVID-19 pandemic had started. The authors explain that this moderate use of  
577 PPE was due to a perceived safeness against COVID-19 transmission in well-ventilated spaces,  
578 and because of the difficulties of using such protection in the hot and humid environment of a  
579 dairy farm [25]. The discrepancy in findings between Yung et al. [25] and our study could be  
580 because the latter assessed dairy processing facilities rather than dairy farms, and targeting the  
581 dairy industry in the US instead of being restricted to Wisconsin and Minnesota. Furthermore,  
582 survey participants in the current study mentioned that the lack of access to preventive measures,  
583 including PPE, was an important concern in efforts to control COVID-19 in their industry sector.  
584 Previous reports indicate that the unavailability of supplies early in the COVID-19 pandemic was  
585 a severe challenge for businesses, even for front-line essential workers in healthcare institutions  
586 in the US [41] and abroad [41,42]. This shortage in PPE and other hygiene supplies was a  
587 consequence of disruptions in the PPE supply chain in the US [43] and elsewhere, whose  
588 weaknesses were exposed during this pandemic [44]. The survey findings about the lack of  
589 access to preventative measures strongly suggest that establishing a reliable and efficient system  
590 to ensure PPE availability and distribution to food facilities/operations is essential for the success

591 of disaster preparedness plans against future pandemics. Altogether, our findings suggest that  
592 sectors of the food industry represented in the survey are prepared to implement biosafety  
593 strategies in the event of a new variant of the SARS-CoV-2 beta-coronavirus, future COVID-19  
594 pandemics or similar disasters caused by airborne-transmitted pathogens, although the success in  
595 their adoption will strongly depend on the establishment of measures to strengthen the local and  
596 global supply chain of PPE and other relevant resources.

597 Contrary to other biosafety strategies, the current study revealed that air filtering and  
598 ventilation were scarcely implemented among facilities/operations (at least as of early 2021) due  
599 to the lack of or insufficient information about cost-effectiveness and guidance. These findings  
600 are somewhat unexpected considering that ventilation and air filtering have been recommended  
601 in late 2020 by the CDC as engineering controls (i.e., measures that do not interfere with  
602 employees' work but prevent their interaction with COVID-19) intended to reduce airborne  
603 concentrations of SARS-CoV-2 beta-coronavirus in indoor environments [22]. Moreover, poor  
604 air quality and air flow inside meat and poultry processing plants have been associated with an  
605 increased risk of workers becoming infected with COVID-19 [24]. Reasons for not  
606 implementing air filtering expressed by survey participants include the disruption of the  
607 controlled environmental conditions required for production, consideration of air filtering as an  
608 unnecessary investment when other mitigation strategies are already in place, and the lack of  
609 guidance in how to properly apply this strategy. The CDC recognizes the challenges associated  
610 with the application of ventilation as a COVID-19 control strategy [22]. Installing air filtering  
611 and ventilation systems is indeed a more complex process compared to other recommended  
612 biosafety strategies to combat COVID-19 since it requires consideration of several additional  
613 factors before their implementation, including the selection of systems adequate to the size,

614 occupancy level, and specific facilities' features (e.g., production environment) [45]. Because of  
615 the complexity of installing air filtering and ventilation systems [22], and the ongoing discussion  
616 about the effectiveness of some of these methods in collecting and/or removing viral particles in  
617 the air [46], we hypothesize that facility management might favor other, easier to implement and  
618 more commonly advised control strategies to prevent COVID-19 transmission. The survey  
619 findings highlight the importance of further research and guidance about the implementation of  
620 air filtering and ventilation and the advantages in terms of cost-effectiveness they present over  
621 other mitigation measures.

622         Surveillance strategies were widely implemented by the participants' produce grower  
623 operations and food processor facilities/operations with the exception of testing and isolation due  
624 to the cost of detecting positive cases of COVID-19. This finding is not surprising considering  
625 that both contact tracing and testing, in conjunction with quarantine, have been proposed as  
626 useful methods to prevent COVID-19 transmission in the community [47,48]. These methods  
627 have also been promoted by the CDC and OSHA as ways to reduce COVID-19 dissemination in  
628 the workplace [33,49]. Indeed, an early report of mitigation strategies used in the food industry  
629 pointed out temperature screening as a widely applied method in the US poultry and meat  
630 industry sectors [15], and it is currently being recommended by the CDC to be implemented in  
631 the food industry facilities and operations [20]. Nonetheless, some survey participants mentioned  
632 difficulties in implementing surveillance mitigation strategies due to funding limitations; this is  
633 expected as a significant investment is required to continuously test suspected cases among  
634 employees and temporarily remove positives from the workforce. Our findings suggest that the  
635 US food industry is willing to apply surveillance measures to prevent further transmission of  
636 COVID-19 cases in their facilities/operations and underline the need to improve access to these

637 measures and to strategically apply them to avoid increasing the costs associated with  
638 absenteeism and productivity loss.

639         Regarding temperature screening, some survey participants expressed distrust to use it as  
640 an approach to detect mild cases of COVID-19 infection, a topic that has been a matter of  
641 discussion throughout the pandemic [50–53]. Slade and Sinha [51] identified issues associated  
642 with temperature screening through non-contact infrared thermometers, namely the risk of close  
643 interaction between the employees and testers when measuring temperature, the variability in  
644 measurements due to lack of training in its application, and the costs associated with hiring  
645 employees to continuously measure temperature among workers. Additionally, previous reports  
646 have suggested poor specificity [54,55] and sensitivity [56] of temperature screening (both  
647 infrared thermometers and thermal imaging cameras) when used to detect mild COVID-19 cases,  
648 which results in many false positives, thus leading to an unnecessarily increased absenteeism and  
649 the associated rise in costs due to productivity loss. Chen et al. [55] found that specificity for  
650 infrared thermometers can range between 61% to 67%, depending on the part of the body being  
651 measured (wrist and forehead, respectively). This is an extremely important drawback for labor-  
652 intensive sectors of the food industry, which rely on the availability of qualified workers to  
653 continue food production. It was proposed that temperature screening has been a valuable and  
654 easy to implement tool to reduce COVID-19 cases, particularly at the beginning of the pandemic  
655 when the knowledge about the virus and the effectiveness of preventive methods and available  
656 guidance was limited [57,58]. However, given the issues associated with this strategy, the  
657 increased access to vaccination against COVID-19, and the widespread implementation of other  
658 controls in the food industry, we believe it relevant to reevaluate the current role and contribution  
659 of temperature screening as a surveillance strategy and how it should be implemented (if its

660 implementation is needed at all) to avoid increasing absenteeism among workers. Ideally,  
661 surveillance methods should be adopted based on tests' availability, ease of implementation, and  
662 accuracy. For the application of temperature screening, maximizing specificity would be crucial  
663 to avoid the costs associated with false-positive cases. This can be achieved by raising the cut-off  
664 value used to define a positive case (increasing the temperature cut-off), establishing more  
665 stringent criteria for diagnosis of COVID-19 cases (e.g., presence of COVID-19 symptoms,  
666 recent exposure to the virus through interaction with infected individuals, or the requirement of  
667 follow-up testing for confirmation of suspected individuals), or applying temperature screening  
668 in series with a second highly specific diagnostic test.

669 **Large and medium-sized food industry facilities/operations have**  
670 **better ability to implement mitigation strategies compared to small**  
671 **businesses. Additionally, there are differences among the dairy and**  
672 **fresh produce industry sectors in their needs and adoption of**  
673 **mitigation strategies**

674 Large and medium-sized facilities/operations of survey participants more frequently  
675 implemented social distancing, biosafety, and surveillance mitigation strategies compared to  
676 small businesses. It is also important to consider that, due to scale economies, implementing  
677 mitigation strategies might lead to a greater reduction in production capacity for smaller  
678 businesses than for larger ones, resulting in greater economic losses that cannot be sustained by  
679 those small businesses, as evidenced by studies pointing out their lack of financial resilience to  
680 sustain the impacts of COVID-19 [59,60]. For example, the implementation of complex

681 measures, such as air cleaning/filtering, which entail high fixed costs, is likely to be  
682 economically infeasible or even unnecessary for operations that consist of only a few employees.  
683 Findings from the survey reveal that small facilities/operations are more commonly concerned  
684 about funding, while participants also mentioned that small facilities/operations struggle to  
685 manage COVID-19 related work absences and that better financial support is required to assist  
686 small to medium-sized businesses. Because small businesses typically lack access to the types of  
687 financial resources readily available to large firms (i.e., institutional funding), research has been  
688 directed to develop cutting-edge and low-cost technologies to assist them in responding to the  
689 COVID-19 pandemic [61,62]. Our findings suggest that small food industry facilities and  
690 operations would benefit from development of low-cost, effective, and flexible mitigation  
691 strategies to help maintain production in their operations during the COVID-19 pandemic.

692 We found that participants' facilities from the dairy industry sector more commonly  
693 adopted specific biosafety and surveillance mitigation strategies compared to the fresh produce  
694 industry sector, while the latter was more likely to be concerned about funding and required  
695 easier approaches to understand continuously changing governmental regulations. We  
696 hypothesize that the comparatively lower adoption of PPE in the fresh produce industry is due to  
697 some operations (farms) being conducted outdoors in the field, in which case the use of goggles  
698 and face shields might prevent employees from performing their tasks efficiently. Indeed, in  
699 contrast to dairy processing plants, the decentralized nature of the fresh produce industry coupled  
700 with the significant heterogeneity in operating practices suggest that not all mitigation strategies  
701 may be appropriate for some operations. Additionally, reduced implementation may be due to  
702 the fact that transmission risk of COVID-19 outdoors is considered lower than indoors.  
703 Differences may also exist in how consistently both industry sectors can access mitigation

704 strategies, as survey participants from the fresh produce sector expressed concerns about funding  
705 limitations. Moreover, our survey findings indicate that the fresh produce industry sector also  
706 needed easier approaches to understand the continuously evolving governmental regulations,  
707 potentially due to the continuous turnover of workers that are incorporated into the workforce  
708 seasonally. These findings reveal important differences in terms of challenges and needs of the  
709 dairy and fresh produce industries and further suggest that innovative approaches are needed for  
710 fresh produce operations to overcome the limitations in PPE use, as well as develop novel  
711 strategies to train the newly recruited workforce more efficiently.

712 **To reduce the US food industry’s vulnerability, it is important to**  
713 **establish plans and guidelines to minimize business interruptions,**  
714 **train the workforce about risk and mitigation strategies, and**  
715 **develop new technologies to face COVID-19-related disruptions**

716 The survey participants considered the establishment of plans and guidelines as very  
717 relevant for reducing the impact of current and future COVID-19 outbreaks. These approaches  
718 would enhance industries’ ability to effectively respond to current and future disruptions in a  
719 timely manner, considering the consequences of the COVID-19 pandemic in the US food  
720 industry, particularly at the beginning of the pandemic [6]. Our findings are consistent with a  
721 previous study calling for the food industry to proactively establish plans and mitigation  
722 strategies to assist in building resiliency and ensuring the correct continuation of the productive  
723 process [63]. This supports the idea that the development of plans and guidelines to prevent  
724 future impacts of the COVID-19 pandemic and similar disasters should be established taking into  
725 consideration the complexity of the food supply chain. More specifically, government and

726 businesses should develop contingency plans to be prepared to effectively address workforce  
727 reduction, economic losses, and facility shutdowns as consequences of the simultaneous effects  
728 of dramatic changes in products' demand [64,65], modifications to products' specifications (e.g.,  
729 package size) [64,65], government-mandated suspension of operations [64,65], and facility  
730 shutdown-related increase in work absences [6].

731         The survey participants also acknowledged the importance of training employees in risk  
732 and mitigation strategies to prevent COVID-19 transmission in their food facilities and  
733 operations. This finding was expected given that training has been a fundamental tool to educate  
734 the workforce on how to behave during the pandemic, correctly implement mitigation strategies,  
735 and understand the current state and federal rules and regulations around the COVID-19  
736 pandemic. Guidelines and training resources made available by the CDC and OSHA have been  
737 useful to train employees in the use of PPE, social distancing practices in the workplace, and  
738 identification of signs and symptoms associated with COVID-19 cases. Importantly, ensuring  
739 access to the internet in facilities and operations located in remote areas is also crucial to allow  
740 them to implement training strategies promptly, a need expressed by survey participants. This is  
741 essential if novel technologies, such as augmented and virtual reality, are to be implemented for  
742 training the workforce on disaster preparedness [66]. Previous reports evidence important  
743 advantages of these novel approaches compared to traditional methods for training, including the  
744 opportunity to socially distance while allowing workers to immerse themselves in the activity at  
745 hand and learn effectively [67].

746         The development of new technological approaches to respond to the COVID-19 and  
747 future pandemic events (e.g., due to new SARS-CoV-2 beta-coronavirus variants) was  
748 considered important by the survey participants. The COVID-19 pandemic has resulted in new



749 technologies being developed at an accelerated pace to promptly assist the food industry in  
750 dealing with the COVID-19 pandemic and beyond [66]. Future advances in digitalization and big  
751 data analysis will assist the food industry in rapidly responding to COVID-19-related or other  
752 similar disruptions through improved access to knowledge for decision-making [5]. For instance,  
753 the design of modeling tools to predict impacts of COVID-19, including costs associated with  
754 absenteeism, effects on productivity, and the cost-effectiveness of implementing available  
755 mitigation strategies would provide useful information to assist the food industry in better  
756 managing the ongoing pandemic. Furthermore, improvements in data collection and  
757 management, such as shared access to data and data traceability, can facilitate relevant  
758 improvements in the efficiency of the food supply chain, while the implementation of automation  
759 and robotics technologies could assist in improving food security and facilitate the adoption of  
760 social distancing measures to prevent airborne pathogen transmission [5,65]. Unquestionably, the  
761 development of new technologies will assist in building resilience to withstand COVID-19-  
762 related disruptions in the US food industry. Nonetheless, we suggest that the implementation of  
763 novel technological approaches must consider maintaining previous efforts made by the industry  
764 sector to improve efficiency, as well as consider the financial investment necessary to implement  
765 technological advances, such as automation [6,68]. Further studies are needed to determine the  
766 specific technological requirements across industry sectors in the US, the ability of food industry  
767 sectors to invest in new technologies, and the mechanisms in which these new advances could  
768 contribute to improving resilience in the industry.

## 769 **Study limitations**

770           The major limitation of the conducted needs assessment survey is relatively low number  
771 of responses received, and the associated potential selection bias, despite the engagement of a  
772 number of professional and trade organizations and the distribution of the survey via social  
773 media. The concurrent widespread application of survey-based studies to understand different  
774 aspects of COVID-19 in the US food industry might have resulted in the industry’s fatigue and  
775 increased reluctance to respond to surveys as the pandemic progresses, particularly given that the  
776 survey designed for this study was distributed more than a year after the pandemic has begun.  
777 This is relevant, as it may have introduced a non-response selection bias to findings presented  
778 here, particularly due to the slim response rate from representatives of the beef/pork and no  
779 responses from the poultry sectors. Thus, any generalization of findings to these sectors should  
780 be done with caution. The reasons for differential participation of the food industry sectors in this  
781 study are unknown. Among responses, almost half were from the dairy industry sector, with a  
782 much lower representation from the fresh produce industry sector. Similarly, in line with the  
783 targeted recruitment efforts, responses were predominantly from individuals in high managerial  
784 positions (c-suite, facility managers, etc.), with only a few responses from non-managerial  
785 positions. Although this potentially limits the range of perspectives included in the study,  
786 opinions, and perceptions from individuals ‘at the top of the ladder’ were targeted because they  
787 can provide valuable insight into facilities and operation’s needs, challenges, decisions, and  
788 overall impacts of the COVID-19 pandemic in the US food industry. However, we recognize that  
789 this study does not include the complete spectrum of worker positions (particularly non-  
790 managerial) and therefore not fully address food industry worker needs. Due to the relatively  
791 small number of responses, more elaborate approaches to control for potential confounding of  
792 the associations between the outcomes and predictors of interest could not be conducted.

793 Considering Likert-item responses as interval/numerical data during statistical analysis led to the  
794 application of non-parametric methods for statistical assessment of associations, which are less  
795 efficient for detecting existing effects than parametric tests. The survey was open for  
796 participation for almost 3 months in early 2021, which was a time characterized by great changes  
797 concerning the response to the COVID-19 pandemic in the US, such as the implementation of  
798 COVID-19 vaccination among essential non-healthcare workers. It is possible that some of those  
799 changes may have affected participants' responses depending on when they completed the  
800 survey and might not represent needs of the US food industry and adoption of mitigation  
801 strategies early in the COVID-19 pandemic. Additionally, although in open-ended questions  
802 participants commented about concerns regarding limited access to COVID-19 vaccines for food  
803 industry employees and their vaccination hesitancy, the survey did not include questions about  
804 vaccination because vaccines were not available at the time the pilot process was finished and  
805 the survey was initially distributed. Thus, timely assessment of the food industry needs regarding  
806 COVID-19 vaccination is still needed. Finally, although information about COVID-19 morbidity  
807 and mortality in the participants' facilities and operations could have provided valuable insights,  
808 we chose to exclude those to improve the response rate.

## 809 **Conclusions**

810 Provided that the responses of survey participants are reflective of the wider US food  
811 industry, the food industry facilities and operations in the US are broadly prepared to protect  
812 their workers and businesses quickly and effectively in the event of a future pandemic due to  
813 SARS-CoV-2 or similar airborne pathogens. Future collaborations between the US food industry  
814 and federal and state agencies to establish contingency plans and define appropriate training, as

815 well as the development of food industry-directed technologies will be crucial to build resilience  
816 against future COVID-19-related and similar disturbances.

## 817 **Acknowledgments**

818 We thank Alina N. Stelick and Cecil Barnett-Neefs for providing feedback during the needs  
819 assessment survey design process. We are also grateful to advisory council members who  
820 assisted during the pilot of the needs assessment survey, the professional and trade organizations  
821 who assisted in its dissemination, and everyone whose participation made this study possible.

## 822 **References**

- 823 1. Galanakis CM. The food systems in the era of the coronavirus (COVID-19) pandemic  
824 crisis. *Foods*. 2021;9: 523. doi:10.1146/annurev-soc-060116-053252
- 825 2. Hayes DJ, Schulz LL, Hart CE, Jacobs KL. A descriptive analysis of the COVID-19  
826 impacts on U.S. pork, turkey, and egg markets. *Agribusiness*. 2021;37: 122–141.  
827 doi:10.1002/agr.21674
- 828 3. Singh S, Kumar R, Panchal R, Tiwari MK. Impact of COVID-19 on logistics systems and  
829 disruptions in food supply chain. *Int J Prod Res*. 2021;59: 1993–2008.  
830 doi:10.1080/00207543.2020.1792000
- 831 4. Barman A, Das R, De PK. Impact of COVID-19 in food supply chain: Disruptions and  
832 recovery strategy. *Curr Res Behav Sci*. 2021;2: 100017. doi:10.1016/j.crbeha.2021.100017
- 833 5. Hobbs JE. The Covid-19 pandemic and meat supply chains. *Meat Sci*. 2021; 108459.  
834 doi:10.1016/j.meatsci.2021.108459

- 835 6. Weersink A, von Massow M, Bannon N, Ifft J, Maples J, McEwan K, et al. COVID-19 and  
836 the agri-food system in the United States and Canada. *Agric Syst.* 2021;188: 103039.  
837 doi:10.1016/j.agsy.2020.103039
- 838 7. Qingbin W, Liu C quan, Zhao Y feng, Kitsos A, Cannella M, Wang S kun, et al. Impacts of  
839 the COVID-19 pandemic on the dairy industry: Lessons from China and the United States  
840 and policy implications. *J Integr Agric.* 2020;19: 2903–2915. doi:10.1016/S2095-  
841 3119(20)63443-8
- 842 8. Muth MK. Effects of COVID-19 Meat and Poultry Plant Closures on the Environment and  
843 Food Security. 2021 Dec 1 [cited 7 Jul 2021]. In: SESYNC [Internet]. Available from:  
844 [https://www.sesync.org/news/wed-2020-12-02-1543/effects-of-covid-19-meat-and-poultry-](https://www.sesync.org/news/wed-2020-12-02-1543/effects-of-covid-19-meat-and-poultry-plant-closures-on-the-environment-and)  
845 [plant-closures-on-the-environment-and](https://www.sesync.org/news/wed-2020-12-02-1543/effects-of-covid-19-meat-and-poultry-plant-closures-on-the-environment-and)
- 846 9. Doering C. Meat processors wrestle with worker shortages as US economy reopens from  
847 COVID- 19. 2021 June 9 [cited 7 Jun 2021]. In: FOODDIVE [Internet]. Available from:  
848 [https://www.fooddive.com/news/meat-processors-wrestle-with-worker-shortages-as-us-](https://www.fooddive.com/news/meat-processors-wrestle-with-worker-shortages-as-us-economy-reopens-from-co/600941/)  
849 [economy-reopens-from-co/600941/](https://www.fooddive.com/news/meat-processors-wrestle-with-worker-shortages-as-us-economy-reopens-from-co/600941/)
- 850 10. McEwan K, Marchand L, Shang M, Bucknell D. Potential implications of COVID-19 on  
851 the Canadian pork industry. *Can J Agric Econ.* 2020;68: 201–206. doi:10.1111/cjag.12236
- 852 11. Hailu G. COVID-19 and food processing in Canada. *Can J Agric Econ Can*  
853 *d’agroéconomie.* 2021;69: 177–187. doi:10.1111/cjag.12286
- 854 12. Mussell A, Bilyea T, Hedley D. Agri-Food Supply Chains and Covid-19: Balancing  
855 Resilience and Vulnerability. *Agri-Food Econ Syst.* 2020; 1–6.

- 856 13. Nakat Z, Bou-Mitri C. COVID-19 and the food industry: Readiness assessment. Food  
857 Control. 2021;121: 107661. doi:10.1016/j.foodcont.2020.107661
- 858 14. Cybersecurity and Infrastructure Security Agency (CISA). Guidance on the Essential  
859 Critical Infrastructure Workforce: Ensuring Community and National Resilience in  
860 COVID-19 Response. 2020 Aug 18 [cited 7 June 2021]. In: Cybersecurity and  
861 Infrastructure Security Agency [Internet]. Available from:  
862 <https://www.cisa.gov/publication/guidance-essential-critical-infrastructure-workforce>
- 863 15. Waltenburg M, Victoroff T, Rose CE, Butterfield M, Jervis RH, Fedak KM, et al. Update:  
864 COVID-19 Among Workers in Meat and Poultry Processing Facilities - United States,  
865 April-May 2020. Report, Mortal Wkly. 2020;69: 557–561.
- 866 16. Shelly M. Maine CDC launches investigation into COVID-19 outbreak at Clinton dairy  
867 farm. 2021 Dec 7 [cited 7 Jun 2021]. In: Central Maine [Internet]. Available from:  
868 [https://www.centralmaine.com/2020/12/07/cdc-launches-investigation-into-covid-19-](https://www.centralmaine.com/2020/12/07/cdc-launches-investigation-into-covid-19-outbreak-at-clinton-dairy-farm/)  
869 [outbreak-at-clinton-dairy-farm/](https://www.centralmaine.com/2020/12/07/cdc-launches-investigation-into-covid-19-outbreak-at-clinton-dairy-farm/)
- 870 17. Kielar M. Lessons learned from one of the largest COVID-19 outbreaks in New York.  
871 2021 Nov 9 [cited 2 Jun 2021]. In: CNYCENTRAL [Internet]. Available from:  
872 [https://cnycentral.com/news/local/investigation-reveals-lessons-learned-from-one-of-the-](https://cnycentral.com/news/local/investigation-reveals-lessons-learned-from-one-of-the-largest-covid-19-outbreaks-in-nys)  
873 [largest-covid-19-outbreaks-in-nys](https://cnycentral.com/news/local/investigation-reveals-lessons-learned-from-one-of-the-largest-covid-19-outbreaks-in-nys)
- 874 18. Douglas L. Mapping Covid-19 outbreaks in the food system. 2020 Apr 22 [cited 7 Jun  
875 2021]. In: Food and Environment Reporting Network [Internet]. Available from:  
876 <https://thefern.org/2020/04/mapping-covid-19-in-meat-and-food-processing-plants/>

- 877 19. Chen YH, Glymour M, Riley A, Balmes J, Duchowny K, Harrison R, et al. Excess  
878 mortality associated with the COVID-19 pandemic among Californians 18-65 years of age,  
879 by occupational sector and occupation: March through November 2020. PLoS One.  
880 2021;16: 1–10. doi:10.1371/journal.pone.0252454
- 881 20. Centers for Disease Control and Prevention (CDC). Agriculture Workers and Employers.  
882 2020 June 2 [cited June 18 2021]. In: Centers for Disease Control and Prevention  
883 [Internet]. Available from: [https://www.cdc.gov/coronavirus/2019-](https://www.cdc.gov/coronavirus/2019-ncov/community/guidance-agricultural-workers.html)  
884 [ncov/community/guidance-agricultural-workers.html](https://www.cdc.gov/coronavirus/2019-ncov/community/guidance-agricultural-workers.html)
- 885 21. Occupational Safety and Health Administration (OSHA). Protecting workers: Guidance on  
886 mitigating and preventing the spread of COVID-19 in the workplace. 2021 Jan 29 [cited  
887 June 18, 2021]. In: Occupational Safety and Health Administration [Internet]. Available  
888 from: <https://www.osha.gov/coronavirus/safework>
- 889 22. Centers for Disease Control and Prevention (CDC). Ventilation in Buildings. 2020 Dec 7  
890 [cited June 18 2021]. In: Centers for Disease Control and Prevention [Internet]. Available  
891 from: <https://www.cdc.gov/coronavirus/2019-ncov/community/ventilation.html>
- 892 23. Occupational Safety and Health Administration (OSHA), Food and Drug administration  
893 (FDA). Employee Health and Food Safety Checklist for Human and Animal Food  
894 Operations During the COVID-19 Pandemic. 2020 Aug 11 [cited June 18 2021]. In:  
895 Occupational Safety and Health Administration [Internet]. Available from:  
896 <https://www.fda.gov/media/141141/download>
- 897 24. Pokora R, Kutschbach S, Weigl M, Braun D, Epple A, Lorenz E, et al. Investigation of  
898 superspreading COVID-19 outbreak events in meat and poultry processing plants in

- 899 Germany: A cross-sectional study. PLoS One. 2021;16: 1–14.  
900 doi:10.1371/journal.pone.0242456
- 901 25. Yung MT, Vázquez RI, Liebman A, Brihn A, Olson A, Loken D, et al. COVID-19  
902 Awareness and Preparedness of Minnesota and Wisconsin Dairy Farms. J Agromedicine.  
903 2021;26: 352–359. doi:10.1080/1059924X.2021.1927925
- 904 26. R Core Team. R: A language and environment for statistical computing. R Foundation for  
905 Statistical Computing. 2017. Available from: <https://www.r-project.org/>
- 906 27. Benjamini J, Hochberg Y. Controlling the False Discovery Rate□: A Practical and  
907 Powerful Approach to Multiple Testing. J R Stat Soc Ser B. 1995;57: 289–300.
- 908 28. Clarke V, Braun V. Thematic Analysis. In: Teo T, editor. Encyclopedia of Critical  
909 Psychology. New York, NY: Springer New York; 2014. pp. 1947–1952. doi:10.1007/978-  
910 1-4614-5583-7\_311
- 911 29. Centers for Disease Control and Prevention (CDC). Interim List of Categories of Essential  
912 Workers Mapped to Standardized Industry Codes and Titles. 2020 Dec 22 [cited 2 Aug  
913 2021]. In: Centers for Disease Control and Prevention [Internet]. Available from:  
914 <https://www.cdc.gov/vaccines/covid-19/categories-essential-workers.html>
- 915 30. John Hopkins University. The vaccine story. 2021 May 16 [cited Jun 7 2021]. In: John  
916 Hopkins University [Internet]. Available: <https://coronavirus.jhu.edu/vaccines/story>
- 917 31. Kluger DM, Aizenbud Y, Jaffe A, Parisi F, Aizenbud L, Minsky-Fenick E, et al. Impact of  
918 healthcare worker shift scheduling on workforce preservation during the COVID-19  
919 pandemic. Infect Control Hosp Epidemiol. 2020;41: 1443–1445. doi:10.1017/ice.2020.337



- 920 32. Thu TPB, Ngoc PNH, Hai NM, Tuan LA. Effect of the social distancing measures on the  
921 spread of COVID-19 in 10 highly infected countries. *Sci Total Environ.* 2020;742: 140430.  
922 doi:10.1016/j.scitotenv.2020.140430
- 923 33. Occupational Safety and Health Administration (OSHA). Guidance on Returning to Work.  
924 2020 Jun 17 [cited Jun 17 2021]. In: Occupational Safety and Health Administration  
925 [Internet]. Available from: <https://www.osha.gov/Publications/OSHA4045.pdf>
- 926 34. Alamosa News. Mushroom farm confirms COVID-19 cases. 2020 May 9 [cited 29 Jun  
927 2020]. In: Alamosa News [Internet]. Available from:  
928 <https://alamosanews.com/article/mushroom-farm-confirms-covid-19-cases>
- 929 35. U.S. Department of Agriculture (USDA). USDA Announces Coronavirus Food Assistance  
930 Program. 2020 Apr 17 [cited 17 Jun 2021]. In: U.S. Department of Agriculture [Internet].  
931 Available from: [https://www.usda.gov/media/press-releases/2020/04/17/usda-announces-](https://www.usda.gov/media/press-releases/2020/04/17/usda-announces-coronavirus-food-assistance-program)  
932 [coronavirus-food-assistance-program](https://www.usda.gov/media/press-releases/2020/04/17/usda-announces-coronavirus-food-assistance-program)
- 933 36. U.S. Small Business Administration (SBA). COVID-19 EIDL. 2021 Jun 16 [cited 17 Jun  
934 2021]. Available from: U.S. Small Business Administration [Internet].  
935 <https://www.sba.gov/funding-programs/loans/covid-19-relief-options/eidl/covid-19-eidl>
- 936 37. U.S. Congress. H.R.748 - CARES Act. 2020 March 27 [cited Jun 17 2021]. In: U.S.  
937 Congress [Internet]. Available from: [https://www.congress.gov/bill/116th-congress/house-](https://www.congress.gov/bill/116th-congress/house-bill/748)  
938 [bill/748](https://www.congress.gov/bill/116th-congress/house-bill/748)
- 939 38. U.S. Small Business Administration (SBA). Paycheck Protection Program. 2020 Mar 20.  
940 In: U.S. Small Business Administration [Internet]. Available from:

- 941 <https://www.sba.gov/funding-programs/loans/covid-19-relief-options/paycheck-protection->  
942 [program](https://www.sba.gov/funding-programs/loans/covid-19-relief-options/paycheck-protection-program)
- 943 39. Zorn ML, Norman PM, Butler FC, Bhussar MS. Cure or curse: Does downsizing increase  
944 the likelihood of bankruptcy? *J Bus Res.* 2017;76: 24–33.  
945 doi:10.1016/j.jbusres.2017.03.006
- 946 40. Kivimäki M, Vahtera J, Pentti J, Ferrie JE. Factors underlying the effect of organisational  
947 downsizing on health of employees: Longitudinal cohort study. *Br Med J.* 2000;320: 971–  
948 975. doi:10.1136/bmj.320.7240.971
- 949 41. Ahmed J, Malik F, Bin Arif T, Majid Z, Chaudhary MA, Ahmad J, et al. Availability of  
950 Personal Protective Equipment (PPE) Among US and Pakistani Doctors in COVID-19  
951 Pandemic. *Cureus.* 2020;12: e8550. doi:10.7759/cureus.8550
- 952 42. Kim H, Hegde S, Lafiura C, Raghavan M, Sun N, Cheng S, et al. Access to personal  
953 protective equipment in exposed healthcare workers and COVID-19 illness, severity,  
954 symptoms and duration: A population-based case-control study in six countries. *BMJ Glob*  
955 *Heal.* 2021;6: 1–9. doi:10.1136/bmjgh-2020-004611
- 956 43. Cohen J, Rodgers Y van der M. Contributing factors to personal protective equipment  
957 shortages during the COVID-19 pandemic. *Prev Med (Baltim).* 2020;141: 106263.  
958 doi:10.1016/j.ypped.2020.106263
- 959 44. Dai T, Zaman MH, Padula W V., Davidson PM. Supply chain failures amid Covid-19  
960 signal a new pillar for global health preparedness. *J Clin Nurs.* 2021;30: e1–e3.  
961 doi:10.1111/jocn.15400

- 962 45. Blocken B, van Druenen T, Ricci A, Kang L, van Hooff T, Qin P, et al. Ventilation and air  
963 cleaning to limit aerosol particle concentrations in a gym during the COVID-19 pandemic.  
964 *Build Environ.* 2021;193: 107659. doi:10.1016/j.buildenv.2021.107659
- 965 46. Ham S. Prevention of exposure to and spread of COVID-19 using air purifiers: challenges  
966 and concerns. *Epidemiol Health.* 2020;42: 1–3. doi:10.4178/epih.e2020027
- 967 47. Aleta A, Martín-Corral D, Pastore y Piontti A, Ajelli M, Litvinova M, Chinazzi M, et al.  
968 Modelling the impact of testing, contact tracing and household quarantine on second waves  
969 of COVID-19. *Nat Hum Behav.* 2020;4: 964–971. doi:10.1038/s41562-020-0931-9
- 970 48. Quilty BJ, Clifford S, Hellewell J, Russell TW, Kucharski AJ, Flasche S, et al. Quarantine  
971 and testing strategies in contact tracing for SARS-CoV-2: a modelling study. *Lancet Public  
972 Heal.* 2021;6: e175–e183. doi:10.1016/S2468-2667(20)30308-X
- 973 49. Centers for Disease Control and Prevention (CDC). SARS-CoV-2 testing strategy:  
974 considerations for non-healthcare workplaces. 2021 Jul 4 [cited July 17 2021]. In: Centers  
975 for Disease Control and Prevention [Internet]. Available from:  
976 [https://www.cdc.gov/coronavirus/2019-ncov/community/organizations/testing-non-  
977 healthcare-workplaces.html](https://www.cdc.gov/coronavirus/2019-ncov/community/organizations/testing-non-healthcare-workplaces.html)
- 978 50. Bielecki M, Cramer GAG, Schlagenhauf P, Buehrer TW, Deuel JW. Body temperature  
979 screening to identify SARS-CoV-2 infected young adult travellers is ineffective. *Travel  
980 Med Infect Dis.* 2020;37: 101832. doi:10.1016/j.tmaid.2020.101832
- 981 51. Slade DH, Sinha MS. Return to Work during COVID-19: Temperature Screening is No  
982 Panacea. *Infect Control Hosp Epidemiol.* 2020;2019: 1–2. doi:10.1017/ice.2020.1225

- 983 52. Mitra B, Luckhoff C, Mitchell RD, O'Reilly GM, Smit DV, Cameron PA. Temperature  
984 screening has negligible value for control of COVID-19. *Emerg Med Australas.* 2020;32:  
985 867–869. doi:10.1111/1742-6723.13578
- 986 53. Facente SN, Hunter LA, Packel LJ, Li Y, Harte A, Nicolette G, et al. Feasibility and  
987 effectiveness of daily temperature screening to detect COVID-19 in a large public  
988 university setting. medRxiv: [Preprint]. 2021. doi: 10.1101/2021.03.22.21254140
- 989 54. Martinez-Jimenez MA, Loza-Gonzalez VM, Kolosovas-Machuca ES, Yanes-Lane ME,  
990 Ramirez-GarciaLuna AS, Ramirez-GarciaLuna JL. Diagnostic accuracy of infrared thermal  
991 imaging for detecting COVID-19 infection in minimally symptomatic patients. *Eur J Clin*  
992 *Invest.* 2021;51: 1–8. doi:10.1111/eci.13474
- 993 55. Chen G, Xie J, Dai G, Zheng P, Hu X, Lu H, et al. Validity of the use of wrist and forehead  
994 temperatures in screening the general population for covid-19: A prospective real-world  
995 study. *Iran J Public Health.* 2020;49: 57–66. doi:10.18502/ijph.v49is1.3670
- 996 56. Pană BC, Lopes H, Furtunescu F, Franco D, Rapcea A, Stanca M, et al. Real-World  
997 Evidence: The Low Validity of Temperature Screening for COVID-19 Triage. *Front Public*  
998 *Heal.* 2021;9: 1–6. doi:10.3389/fpubh.2021.672698
- 999 57. Daga MK. From SARS-CoV to Coronavirus Disease 2019 (COVID-19) - A Brief Review.  
1000 *J Adv Res Med.* 2020;06: 1–9. doi:10.24321/2349.7181.201917
- 1001 58. Izzetti R, Nisi M, Gabriele M, Graziani F. COVID-19 Transmission in Dental Practice:  
1002 Brief Review of Preventive Measures in Italy. *J Dent Res.* 2020;99: 1030–1038.  
1003 doi:10.1177/0022034520920580

- 1004 59. Bartik AW, Bertrand M, Cullen Z, Glaeser EL, Luca M, Stanton C. The impact of COVID-  
1005 19 on small business outcomes and expectations. *Proc Natl Acad Sci U S A*. 2020;117:  
1006 17656–17666. doi:10.1073/pnas.2006991117
- 1007 60. Fairlie R. The impact of COVID-19 on small business owners: Evidence from the first  
1008 three months after widespread social-distancing restrictions. *J Econ Manag Strateg*.  
1009 2020;29: 727–740. doi:10.1111/jems.12400
- 1010 61. Akpan IJ, Udoh EAP, Adebisi B. Small business awareness and adoption of state-of-the-art  
1011 technologies in emerging and developing markets, and lessons from the COVID-19  
1012 pandemic. *J Small Bus Entrep*. 2020;0: 1–18. doi:10.1080/08276331.2020.1820185
- 1013 62. Akpan IJ, Soopramanien D, Kwak DH. Cutting-edge technologies for small business and  
1014 innovation in the era of COVID-19 global health pandemic. *J Small Bus Entrep*. 2020;0: 1–  
1015 11. doi:10.1080/08276331.2020.1799294
- 1016 63. Boyacı-Gündüz CP, Ibrahim SA, Wei OC, Galanakis CM. Transformation of the food  
1017 sector: Security and resilience during the covid-19 pandemic. *Foods*. 2021.  
1018 doi:10.3390/foods10030497
- 1019 64. Luckstead J, Nayga RM, Snell HA. Labor Issues in the Food Supply Chain Amid the  
1020 COVID-19 Pandemic. *Appl Econ Perspect Policy*. 2021;43: 382–400.  
1021 doi:10.1002/aepp.13090
- 1022 65. Hobbs JE. Food supply chain resilience and the COVID-19 pandemic: What have we  
1023 learned? *Can J Agric Econ*. 2021; 189–196. doi:10.1111/cjag.12279

- 1024 66. Galanakis CM, Rizou M, Aldawoud TMS, Ucak I, Rowan NJ. Innovations and technology  
1025 disruptions in the food sector within the COVID-19 pandemic and post-lockdown era.  
1026 Trends Food Sci Technol. 2021;110: 193–200. doi:10.1016/j.tifs.2021.02.002
- 1027 67. Akçayır M, Akçayır G. Advantages and challenges associated with augmented reality for  
1028 education: A systematic review of the literature. Educ Res Rev. 2017;20: 1–11.  
1029 doi:10.1016/j.edurev.2016.11.002
- 1030 68. Saitone TL, Aleks Schaefer K, Scheitrum DP. COVID-19 morbidity and mortality in U.S.  
1031 meatpacking counties. Food Policy. 2021;101: 102072. doi:10.1016/j.foodpol.2021.102072

1032

1033 **S1 Table. All questions (Q) included in the needs assessment survey, question type, type of**  
1034 **analysis (statistical or thematic) and role in statistical analysis of associations (as an**  
1035 **outcome of interest (primary or secondary) or independent variable (predictor).** Responses  
1036 considered usable for analysis were those in which participants completed at least part 1 of the  
1037 needs assessment survey.

1038 **S2 Table. Themes and underlying codes identified in participants' responses to selected**  
1039 **open-ended questions in the needs assessment survey, which were intended to provide**  
1040 **depth to the corresponding Likert questions.** An example quote is included to illustrate each  
1041 of the codes identified.

1042 **S3 Table. Significant associations found in the bivariable analyses ( $P \leq 0.05$ ) using Mann-**  
1043 **Whitney U (MW-U) and Spearman's correlation (SC) tests between a specific Likert item**  
1044 **(outcome) in a survey question (Q) and independent variables (predictors).**

1045 **S1 Appendix. Copy of the needs assessment survey instrument.**

1046

**A**

**Q5. Regarding control of COVID-19 in your industry sector, how concerning are the items below?**

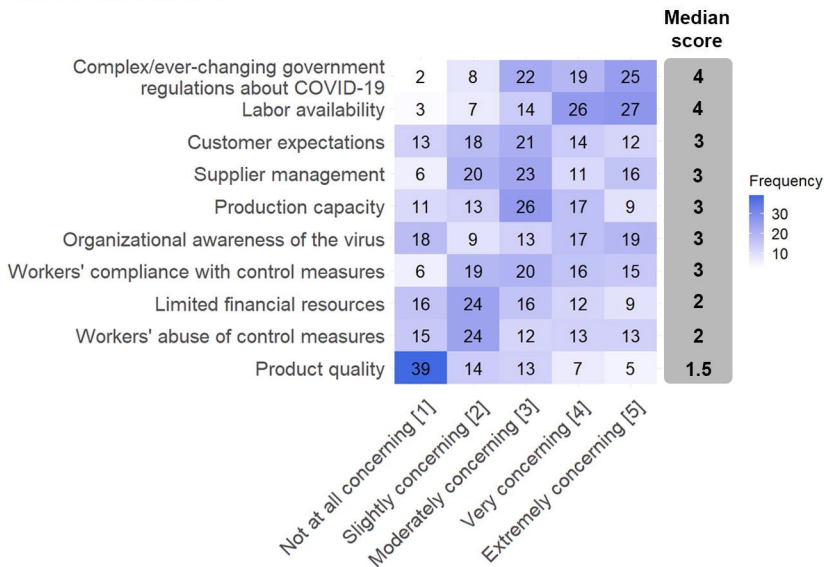**B**

**Q7. Regarding the labor force needed to maintain the production capacity in your industry sector during the COVID-19 pandemic, how challenging are the items below?**

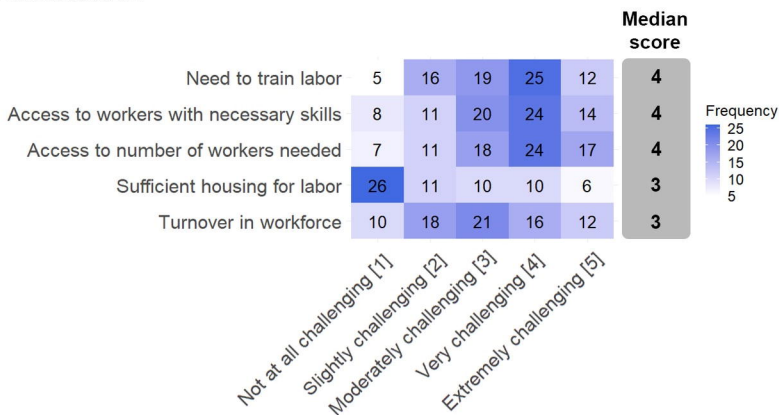



**A** Q9. Regarding needs to successfully respond COVID-19 in your industry sector, how important are the items below?

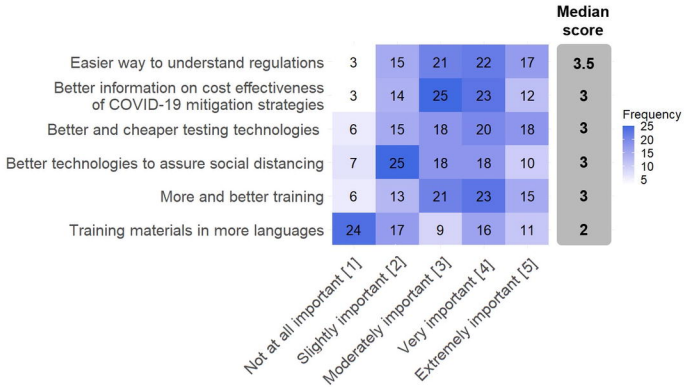

**B** Q11. If computational modeling tools were available to predict which COVID-19 mitigation strategies would most likely be successful in a given facility/operation at a given time, how important would the model features below be for your industry sector?

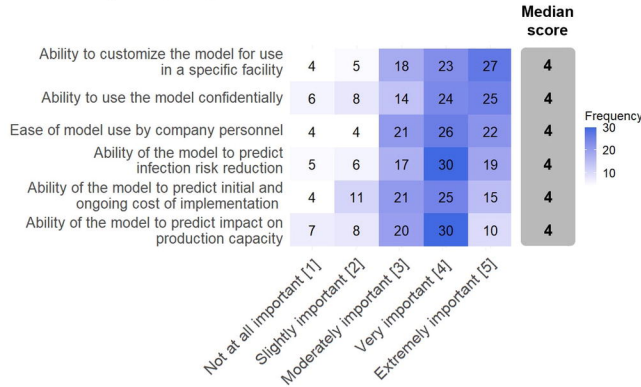

**C** Q13. Regarding indicators of successful responses to COVID-19 in your industry sector, how important are the items below?

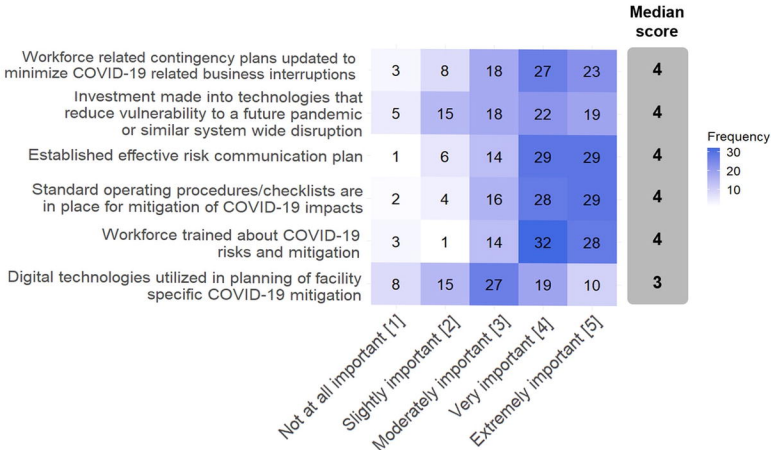

**A**

**Q27. How would you describe the risk of a shutdown in this facility operation due to work absences in each of the specialized job functions below?**

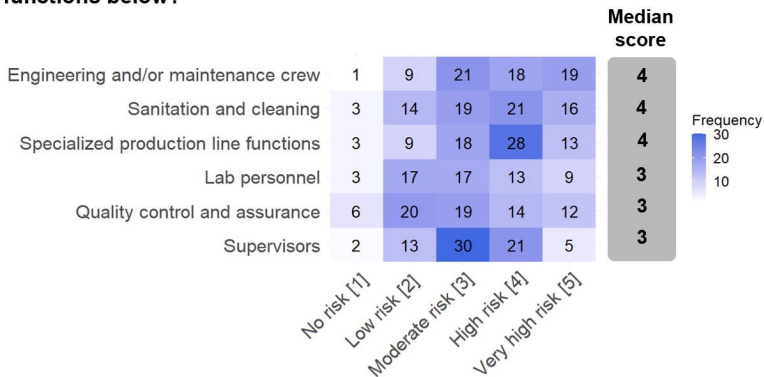**B**

**Q29. Regarding potential sources of COVID-19 infection in this facility/operation, how concerning are the items below?**

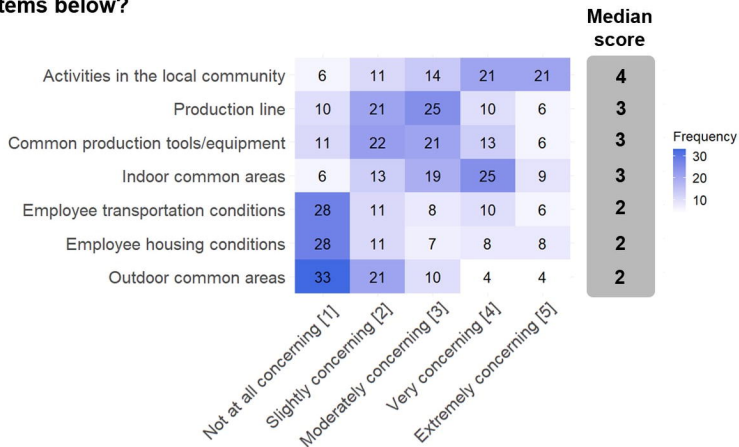

**A****Q34. Have any of these social distancing strategies been applied in this facility/operation at any point since the start of the COVID-19 pandemic?**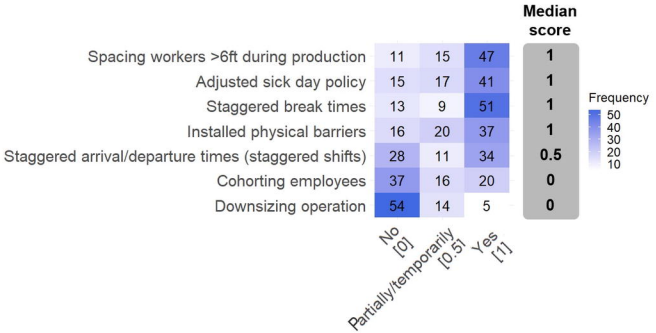**B****Q36. Have any of these biosafety strategies been applied in this facility/operation at any point since the start of the COVID-19 pandemic?**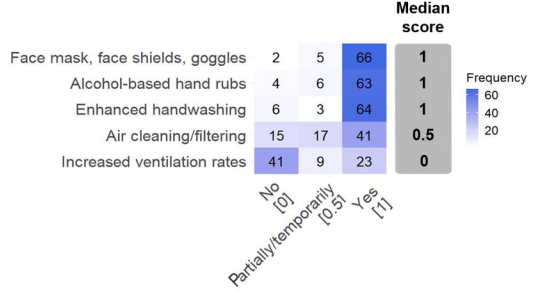**C****Q38. Have any of these surveillance strategies been applied in this facility/operation at any point since the start of the COVID-19 pandemic?**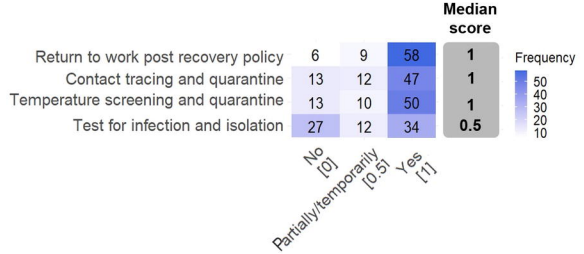

Source: https://www.medrxiv.org/content/medrxiv/early/2021/08/09/2021.08.06.21261702.full.pdf
